RESEARCH ARTICLE

# Characterization of the Maize Chitinase Genes and Their Effect on *Aspergillus flavus* and Aflatoxin Accumulation Resistance

Leigh K. Hawkins<sup>1\*</sup>, J. Erik Mylroie<sup>1</sup>, Dafne A. Oliveira<sup>2</sup>, J. Spencer Smith<sup>1</sup>, Seval Ozkan<sup>2</sup>, Gary L. Windham<sup>1</sup>, W. Paul Williams<sup>1</sup>, Marilyn L. Warburton<sup>1</sup>

**1** USDA-ARS Corn Host Plant Resistance Research Unit, Mississippi State, Starkville, MS, United States of America, **2** Department of Biochemistry, Molecular Biology, Entomology, and Plant Pathology, Mississippi State University, Starkville, MS, 39762, United States of America

\* [Leigh.Hawkins@ars.usda.gov](mailto:Leigh.Hawkins@ars.usda.gov)

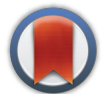

CrossMark  
click for updates

## OPEN ACCESS

**Citation:** Hawkins LK, Mylroie JE, Oliveira DA, Smith JS, Ozkan S, Windham GL, et al. (2015) Characterization of the Maize Chitinase Genes and Their Effect on *Aspergillus flavus* and Aflatoxin Accumulation Resistance. PLoS ONE 10(6): e0126185. doi:10.1371/journal.pone.0126185

**Academic Editor:** Roger A Coulombe, Utah State University, UNITED STATES

**Received:** August 7, 2014

**Accepted:** March 30, 2015

**Published:** June 19, 2015

**Copyright:** This is an open access article, free of all copyright, and may be freely reproduced, distributed, transmitted, modified, built upon, or otherwise used by anyone for any lawful purpose. The work is made available under the [Creative Commons CC0](https://creativecommons.org/licenses/by/4.0/) public domain dedication.

**Data Availability Statement:** All relevant data are within the paper and its Supporting Information files.

**Funding:** This work was supported by the USDA ([http://www.ars.usda.gov/main/site\\_main.htm?modecode=64-06-15-05](http://www.ars.usda.gov/main/site_main.htm?modecode=64-06-15-05)) and the joint USDA/USAID Feed the Future initiative project number 58-0210-3-0012 ([www.usaid.gov](http://www.usaid.gov)). The funders had no role in study design, data collection and analysis, decision to publish, or preparation of the manuscript.

**Competing Interests:** The authors have declared that no competing interests exist.

## Abstract

Maize (*Zea mays* L.) is a crop of global importance, but prone to contamination by aflatoxins produced by fungi in the genus *Aspergillus*. The development of resistant germplasm and the identification of genes contributing to resistance would aid in the reduction of the problem with a minimal need for intervention by farmers. Chitinolytic enzymes respond to attack by potential pathogens and have been demonstrated to increase insect and fungal resistance in plants. Here, all chitinase genes in the maize genome were characterized via sequence diversity and expression patterns. Recent evolution within this gene family was noted. Markers from within each gene were developed and used to map the phenotypic effect on resistance of each gene in up to four QTL mapping populations and one association panel. Seven chitinase genes were identified that had alleles associated with increased resistance to aflatoxin accumulation and *A. flavus* infection in field grown maize. The chitinase in bin 1.05 identified a new and highly significant QTL, while chitinase genes in bins 2.04 and 5.03 fell directly beneath the peaks of previously published QTL. The expression patterns of these genes corroborate possible grain resistance mechanisms. Markers from within the gene sequences or very closely linked to them are presented to aid in the use of marker assisted selection to improve this trait.

## Introduction

Maize (*Zea mays* L.), a major industrial commodity, feed grain, and staple food for many people in the developing world, is especially prone to contamination by aflatoxins produced by the fungi in the genus *Aspergillus* [1]. Because of the established ability of aflatoxins to suppress human and animal immune systems, negatively impact growth and development, and induce liver cancer, aflatoxins are the most widely studied mycotoxins. Over 100 countries have established or proposed regulations for controlling aflatoxins in foods and feed [2–4]. The U.S. Food and Drug Administration [5] has set a tolerance level of 20 ng·g<sup>-1</sup> for aflatoxin B<sub>1</sub> for maize

designated for human consumption; currently, no commercially available US maize hybrids show sufficient levels of resistance to aflatoxin accumulation when faced with high disease pressure.

A desirable approach for reducing *A. flavus* infection and/or aflatoxin production is the development of resistant germplasm. Several natural sources of resistance have been identified in maize, but transfer of resistance into elite breeding lines is hampered by the quantitative nature of the trait and high genotype by environment interactions [6]. The identification of specific genes with a significant effect on resistance to *A. flavus* or aflatoxin accumulation would enable more rapid production of resistant maize inbred lines and hybrids. Genes encoding pathogenesis-related (PR) proteins include several evolutionarily conserved families with individual family members differing widely in occurrence and activity [7]. Chitinolytic enzymes belong to four recognized families of PR proteins (PR-3, PR-4, PR-8, and PR-11) that respond to attack by potential pathogens or the presence of elicitor treatments and a variety of abiotic stresses [7–13].

Chitinolytic enzymes are found in microorganisms, plants, and animals, and hydrolyze chitin, a major component of fungal cell walls, to *N*-acetylglucosamine (GlcNAc) [9, 14]. The GlcNAc subunits serve as signal molecules in phytopathogenic responses and are also part of the sugar chain of glycoproteins and glycolipids in plants [10]. Several observations suggest that the primary function of the induced expression of plant chitinases, acting alone or in combination with  $\beta$ -1,3-glucanases, is defense against fungal pathogens [9, 13, 15]. Constitutively-expressed chitinases function in a range of physiological and morphological processes including embryogenesis, flowering, senescence, and seed germination [7, 11, 13, 16, 17]. Based on physiochemical and enzymatic properties, chitinases belong to the Glycoside Hydrolase (GH) superfamily (IPR017853) [13, 18]. The endochitinases (E.C. 3.2.1.14) cleave the chitin chain randomly and are found in GH families 18 and 19. Chitinases in GH family 18 are ubiquitous while those in GH family 19 are found in plants and *Streptomyces* [10, 13]. Exochitinases ( $\beta$ -hexosaminidase (EC 3.2.1.52)) cleave GlcNAc subunits from the non-reducing end of the chitin molecule, and are found in GH family 20 [10, 13, 18]. Previous proteomic studies of *A. flavus* and aflatoxin accumulation in maize have identified possible links between some chitinase sequences and resistance. Studies using susceptible and resistant maize inbred lines have identified several differentially regulated proteins, including the named chitinase genes PRm3 (S82314), chitinase I (Q6JBN0 and B6TFQ3) and chitinase A (Q6JBK8 and P29022) [19], and an unidentified endochitinase [20].

The effect of any gene sequence on the phenotype of an organism can be measured via linkage and association mapping. When both of these techniques are performed on the same sequence and phenotype, they greatly complement each other. Association mapping identifies DNA polymorphisms linked to the causal mutation of a phenotype and can provide resolution to within hundreds or a few thousand base pairs [21, 22]. Due to the diversity that can be screened in an association study, the most favorable alleles of a gene series can be identified simultaneously. Genetic or quantitative trait loci (QTL) mapping does not lead to such high levels of resolution, but can more precisely measure the effects of a genomic region because mapping populations usually represent a less genetically complex background, and alleles are present in balanced proportions, leading to stronger statistical power. While genome-wide association studies (GWAS) simultaneously measure association between trait(s) of interest and thousands of sequence polymorphisms, candidate gene based association mapping is a very powerful hypothesis-driven method for testing a few sequences at a time, and it does not suffer from multiple testing problems that plague GWAS analyses.

The Corn Host Plant Resistance Research Unit (CHPRRU) of the USDA ARS has developed resources for the association mapping and QTL mapping of aflatoxin accumulation and *A. flavus* resistance in maize [6, 23]. These include four QTL mapping populations created with

diverse parents, ensuring the possibility of finding polymorphisms between the parents for many candidate gene sequences [24–27] and an association mapping panel of diverse maize lines [23]. All genetic resources have been phenotyped for aflatoxin accumulation and related traits in replicated, multi-year and location field trials. In light of the evidence that some maize chitinase genes may actively contribute to *A. flavus* resistance, the objectives of this study were to characterize all major chitinase genes in maize; test them for their ability to increase resistance to aflatoxin accumulation and *A. flavus* infection in field grown maize; and identify and design easy-to-use markers for the alleles that increase resistance for the marker-assisted improvement of this trait.

## Materials and Methods

The databases from MaizeGDB [28], Gramene (B73 Reference Sequence) [29], UniProt [30], InterPro [31], UniGene [32, 33] and Carbohydrate-Active enZymes (CAZY) [34] were queried for any gene and/or protein with maize chitinolytic activity or sequence homology. The Maize-Cyc database [35] was also searched for any gene member with chitinase activity (GO:0004568), chitin catabolic activity (GO:0006032), and/or chitin binding (GO:0008061) (S1 Table). In addition, a literature search was conducted to find published maize chitinase genes. A total of thirty-three unique genes were identified: 13 GH-18 family members; 17 GH-19 family members and 3 GH-20 family members (Table 1). These genes were found on every maize chromosome except chromosome 9. An attempt was made to avoid redundancy in this table, as there were often different Uniprot or Unigene designations for different transcripts and/or proteins of the same gene (S1 Table). Sequences physically very close together were aligned to ensure they were not the same gene being reported by different authors or databases. A table of all final gene and protein sequences used in this study can be found in S2 Table.

Two of the genes with very long introns (GRMZM2G099454, intron length 1878 and GRMZM2G034598, intron length 8683), were sequenced directly to confirm the reported B73 reference sequence. Fragments were amplified to “walk” down the length of each gene across the intron and flanking exonic regions. For GRMZM2G099454, amplicons successfully amplified in B73 and three other genotypes for most of the fragments; these were sequenced and aligned (data not shown). Thus we believe that this intron is real and correctly reported in the B73 reference sequence. For GRMZM2034598, the amplicons for the flanking exonic regions did amplify and the sequences correctly aligned to the B73 reference sequence. However, most of the amplicons from within the intron or in the intron/exon borders did not amplify and could not be sequenced. Although this is not a conclusive test, we therefore suspect that the reported sequence is incorrect at this intron (data not shown). This will not invalidate mapping tests with this gene reported here.

Very similar sequences were explored further using NCBI BLAST tools [36] to provide clues to recent evolutionary history. By searching the protein family (Pfam) motif IDs [37] and viewing gene structure using the genomic sequence option in the PIECE database [38], the chitinases were grouped and exon sequence similarities were viewed by their GH family (Fig 1). The transcription level and tissue specificity of each gene was obtained from the B73 derived gene atlas available from MaizeGDB [39–41] (S1 Fig).

The QTL mapping populations used for verification of phenotypic effects of each candidate gene consisted of four  $F_{2,3}$  linkage mapping families. These mapping populations have been characterized and published previously. The mapping populations derived from initial crosses between the following pairs of parents: Mp313E (resistant to aflatoxin accumulation) and Va35 (susceptible) [27], Mp313E and B73 (susceptible) [24]; Mp715 (resistant) and T173 (susceptible) [6]; and Mp717 (resistant) and NC300 (susceptible) [25].  $F_1$  plants were selfed to create  $F_2$

**Table 1. List of maize chitinases (in order by chromosomal position).**

| #  | Glycoside Hydrolase Family | Gramene       | UniProt | Description                       | Bin  | Position |                         |             | References  |                    |
|----|----------------------------|---------------|---------|-----------------------------------|------|----------|-------------------------|-------------|-------------|--------------------|
|    |                            |               |         |                                   |      | Chr      | From                    | To          |             | +/-                |
| 1  | GH-19                      | GRMZM2G099454 | B6T6W1  | Basic endochitinase C             | 1.01 | 1        | 7,403,531               | 7,408,184   | +           | 10, 29, 30, 35, 38 |
| 2  | GH-19                      | GRMZM2G312226 |         | Chitinase family protein          | 1.02 | 1        | 22,893,595              | 22,594,905  | -           | 30, 35             |
| 3  | GH-20                      | GRMZM2G134251 | B4F7Z2  | Beta-hexosaminidase               | 1.02 | 1        | 27,303,824              | 27,306,170  | -           | 10, 28, 30, 38     |
| 4  | GH-19                      | GRMZM2G103668 | B6SZN3  | Putative uncharacterized protein  | 1.05 | 1        | 85,545,979              | 85,547,146  | +           | 10, 29, 30, 35, 38 |
|    |                            | GRMZM2G544531 |         |                                   |      |          | 1                       | 85,544,822  | 85,546,118  |                    |
| 5  | GH-18                      | GRMZM2G162505 | B4G1L5  | Chitinase 2                       | 1.08 | 1        | 240,766,113             | 240,767,264 | +           | 10, 29, 30, 35, 38 |
|    |                            | GRMZM2G057093 |         |                                   |      |          | 1                       | 240,756,899 | 240,757,825 |                    |
| 6  | GH-19                      | GRMZM2G051921 | C0PKN5  | Putative uncharacterized protein  | 2.04 | 2        | 33,506,460              | 33,508,810  | +           | 29, 30, 35, 38     |
| 7  | GH-19                      | GRMZM2G051943 | P29022  | Endochitinase A                   | 2.04 | 2        | 33,534,101              | 33,535,449  | +           | 28, 30, 35, 38     |
| 8  | GH-19                      | GRMZM2G052175 | B6SZA3  | Endochitinase A                   | 2.04 | 2        | 33,537,139              | 33,539,360  | +           | 29, 30, 35, 38     |
|    |                            | GRMZM2G122708 |         | Homolog of carrot EP3-3 Chitinase | 2.04 | 2        | 33,558,850              | 33,559,772  | -           |                    |
| 9  | GH-18                      | GRMZM2G403475 | B6U1W5  | Putative uncharacterized protein  | 3.04 | 3        | 118,806,302             | 118,807,527 | +           | 30, 35             |
| 10 | GH-18                      | GRMZM5G837822 | B6TVA3  | Hevamine-A                        | 3.06 | 3        | 176,570,295             | 176,571,270 | -           | 10, 29, 30, 35, 38 |
|    |                            | GRMZM2G430936 | none    | Chitinase A                       | 3.06 | 3        | 176,597,396             | 176,598,753 | -           | 30, 35             |
|    |                            | GRMZM2G430942 | none    | Chitinase A                       | 3.06 | 3        | 176,599,800             | 176,601,118 | -           | 30, 35, 38         |
|    |                            | GRMZM2G023650 | none    | Chitinase A                       | 3.06 | 3        | 176,676,857             | 176,678,050 | -           | 30, 35, 38         |
| 11 | GH-18                      | GRMZM2G453805 | P93518  | Prm3, chem5, chn1                 | 3.08 | 3        | 212,009,199             | 212,001,553 | -           | 10, 29, 30, 35, 38 |
| 12 | GH-18                      | GRMZM2G133781 | B4FR99  | Putative uncharacterized protein  | 4.02 | 4        | 6,624,888               | 6,626,733   | +           | 10, 35, 38         |
| 13 | GH-18                      | GRMZM2G358153 | B4FBN8  | Chitinase 1                       | 4.03 | 4        | 12,082,697              | 12,084,089  | +           | 30, 35, 38         |
| 14 | GH-19                      | GRMZM2G064360 | B6TFQ3  | Basic endochitinase 1             | 5.03 | 5        | 63,229,136              | 63,230,645  | +           | 10, 30, 35, 38     |
| 15 | GH-19                      | GRMZM2G389582 | Q41795  | Chitinase chn3                    | 5.03 | 5        | 63,277,951              | 63,280,101  | +           | 10, 29, 30, 35, 38 |
|    |                            | GRMZM2G389557 |         |                                   |      |          | 5                       | 63,277,675  | 63,280,116  |                    |
| 16 | GH-19                      | GRMZM2G129189 | B6TT00  | Endochitinase PR4                 | 5.05 | 5        | 182,518,442             | 182,519,605 | +           | 10, 30, 35, 38     |
| 17 | GH-18                      | GRMZM2G057766 | B6SZG2  | Chitinase 1                       | 5.06 | 5        | 197,564,845             | 197,565,921 | -           | 30, 35, 38         |
| 18 | GH-18                      | GRMZM2G141456 | B4F9H4  | Chitinase                         | 5.08 | 5        | 215,173,302             | 215,174,990 | -           | 30, 35, 38         |
| 19 | GH-20                      | GRMZM2G034598 | B6ST04  | Beta-hexosaminidase               | 6.01 | 6        | 34,442,195              | 34,456,096  | +           | 10, 28, 38         |
| 20 | GH-19                      | GRMZM2G412577 | K7UKQ3  | Uncharacterized protein           | 6.01 | 6        | 71,462,625              | 71,463,278  | +           | 28, 29, 30, 38     |
| 21 | GH-19                      | GRMZM2G145518 | B8A247  | Putative uncharacterized protein  | 6.01 | 6        | 82,813,531              | 82,815,309  | +           | 10, 30, 35, 38     |
|    |                            | GRMZM2G447967 |         |                                   |      |          | 6                       | 82,813,748  | 82,814,906  |                    |
| 22 | GH-19                      | GRMZM2G145461 | B4G0Q3  | Acidic class I chitinase          | 6.01 | 6        | 82,862,563              | 82,863,789  | -           | 10, 30, 35, 38     |
| 23 | GH-18                      | GRMZM2G447795 | B6U2X8  | Xylanase inhibitor protein 1      | 6.05 | 6        | 129,086,004             | 129,087,221 | +           | 10, 35, 38         |
| 24 | GH-18                      | GRMZM2G328171 | B6SGT3  | Xylanase inhibitor protein 1      | 7.01 | 7        | 10,575,103              | 10,576,227  | -           | 38                 |
|    |                            | GRMZM2G162359 | B4G1C2  |                                   |      |          | Uncharacterized protein | 7.01        | 7           |                    |
| 25 | GH-19                      | GRMZM2G168364 | B4G1H3  | Endochitinase A2                  | 7.03 | 7        | 134,135,706             | 134,137,488 | +           | 10, 30, 35, 38     |
| 26 | GH-19                      | GRMZM2G400497 | K7VNG7  | Uncharacterized protein           | 8.00 | 8        | 839,459                 | 841,251     | +           | 28,29,30, 38       |
| 27 | GH-19                      | GRMZM2G062974 | B6TR38  | Basic Endochitinase A             | 8.03 | 8        | 88,812,713              | 88,814,117  | +           | 10, 30, 35, 38     |
| 28 | GH-19                      | GRMZM2G083292 | KYVXP1  | Putative uncharacterized protein  | 8.03 | 8        | 129,341,989             | 129,343,096 | +           | 29, 30, 38         |

(Continued)

Table 1. (Continued)

| #  | Glycoside Hydrolase Family | Gramene       | UniProt | Description                                | Bin   | Position |             |             | References           |
|----|----------------------------|---------------|---------|--------------------------------------------|-------|----------|-------------|-------------|----------------------|
|    |                            |               |         |                                            |       | Chr      | From        | To          |                      |
| 29 | GH-18                      | GRMZM2G037694 | B6TAN9  | Hydrolase, hydrolyzing O-glycosyl compound | 8.03  | 8        | 144,588,215 | 144,595,174 | 35                   |
| 30 | GH-20                      | GRMZM2G117405 | C0PLT8  | Beta-hexosaminidase                        | 8.03  | 8        | 164,558,359 | 164,563,720 | + 10, 27, 38         |
| 31 | GH-18                      | GRMZM2G400999 | B6U3V2  | Xylanase inhibitor protein 1               | 10.00 | 10       | 1,980,938   | 1,982,242   | + 35, 38             |
| 32 | GH-18                      | GRMZM2G090441 | C0PIX9  | Uncharacterized protein                    | 10.04 | 10       | 107,900,408 | 107,902,133 | + 30, 38, 46         |
| 33 | GH-19                      | GRMZM2G005633 | P29023  | Endochitinase B                            | 10.04 | 10       | 127,370,239 | 127,371,829 | - 10, 27, 30, 34, 38 |

Gramene genetic sequence identification and UniProt protein identification numbers were used as unique identifiers of each chitinase in the study. Bin location indicates genetic mapping location according to MaizeGDB, and Position indicates the physical interval in relation to the B73 maize reference genome (Maize B73 RefGen\_V2). Position on the positive or negative DNA strand is also indicated.

doi:10.1371/journal.pone.0126185.t001

plants, individual seeds of which were grown and selfed to create F<sub>2:3</sub> families. DNA from each F<sub>2</sub> plant was used for genotyping using insertion/ deletion (InDel), single nucleotide polymorphism (SNP), simple sequence repeat (SSR) or restriction fragment length polymorphism (RFLP) markers, and linkage mapping. F<sub>2:3</sub> families were grown in replicated field tests in multiple environments (see individual mapping references for details on the phenotyping of each population). Briefly, ten plants of each family were individually inoculated with a 3.4-ml suspension of 3x10<sup>8</sup> conidia of *Aspergillus flavus* strain NRRL 3357 (ATCC #200026) using the side-needle technique 7 d after mid-silk [42, 43]. Bulked grain samples of each family from dried, shelled ears were ground and the VICAM AflaTest (VICAM, Watertown, MA) was used to determine aflatoxin concentration in 50g samples of ground grain from each plot, according to manufacturer's instructions.

SNP or InDel markers were designed from the sequence of each chitinase candidate gene and tested for polymorphism between the parents of all mapping populations (Table 2). SNPs were converted from sequence data into KASP assays (LGC Genomics, Hertz, UK). When polymorphisms were found, the markers were run on the entire mapping population to test the effect of each gene on the phenotype. When polymorphisms could not be identified in any mapping population for a given chitinase gene sequence, SSR markers within 10,000 Kb were used to test the effect of the region. Flanking markers were used when possible; in some cases, a marker further than 10,000 Kb, or of unknown physical but close genetic location, was used as one of the flanking markers, and a second flanking marker within 10,000 Kb was always used in these cases. Some of the chitinase sequences were within 10,000 Kb of each other; in these cases, QTL mapping did not resolve which of the sequences (if either) affected the trait. Mapping was done using the JoinMap mapping software (version 4) [44]; linkage groups were constructed using the Maximum Likelihood (ML) mapping method. Composite Interval Mapping (CIM) was performed using QTL Cartographer version 2.5 [45] as described by [25]. To estimate the 0.05 significance threshold for QTL, 1000 permutations were performed with each data set and across all data sets [46]. Mapping was done for each environment, location in each year, and across both locations and years, where each population was phenotyped.

The aflatoxin association mapping panel consisted of 287 diverse inbred lines, which have been characterized as described previously [23]. Briefly, testcrosses were formed with Va35, a susceptible, southern adapted inbred line of the non-stiff stalk heterotic pattern, and grown in seven environments. Plants were inoculated and phenotyped as described in the QTL mapping populations, above. Proc GLIMMIX from the SAS statistical software package [47] was used to



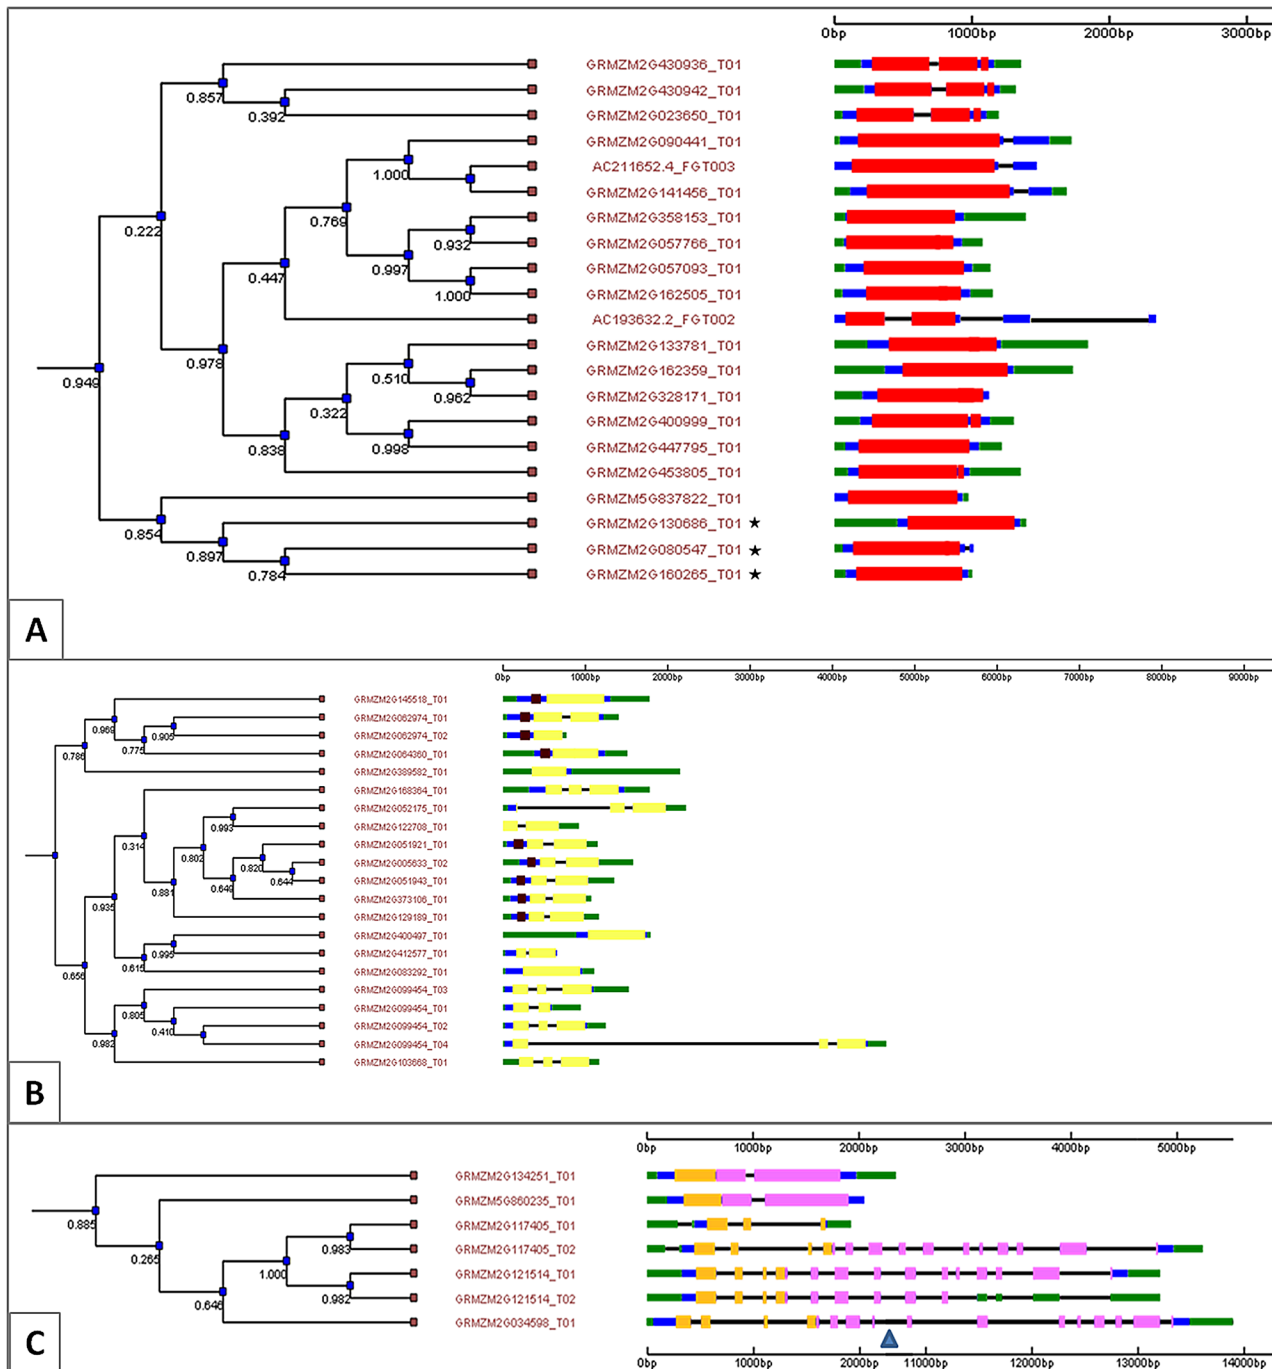

**Fig 1. Dendrogram depicting relationships between gene sequences and gene transcripts within each glycoside hydrolase family (18, 19, and 20) and diagram of gene structure and protein motif for each chitinase using the PIECE database [38]. (A) GH-18 family chitinases; (B) GH-19 family chitinases; (C) GH-20 family chitinases, Intron (black); CDS (blue); untranslated region (UTR, Green); Glycoside Hydrolase protein family 18 domain (PF00704 (red)); FHIPEP protein family for type III secretions (PF00771 (purple)). Glycoside Hydrolase protein family 19 (PF0182 (yellow)); Carbohydrate-binding module protein family (PF00187 (brown)); Glycoside hydrolase protein family 20, domain 2 protein family (PF02838 (orange)), Glycoside Hydrolase protein family 20 PF00728 (pink). Blue triangle denotes large intron in GRMZM2G034598. Note change in scale.**

doi:10.1371/journal.pone.0126185.g001

**Table 2. List of SNPs, InDels, and SSRs used to map the phenotypic effect of each candidate gene in the linkage mapping populations.**

| #  | Gene(s)       | Marker        | Marker Type  | To test Bin | Population tested    | Estimated start location of marker |             |
|----|---------------|---------------|--------------|-------------|----------------------|------------------------------------|-------------|
| 1  | GRMZM2G099454 | umc1292       | SSR          | 1.01        | MpT                  | 3,732,780                          |             |
|    |               | umc1727       | SSR          | 1.01        | MpT                  | 8,560,823                          |             |
|    |               | umc1948       | SSR          | 1.01        | MpB                  | 8,537,358                          |             |
| 2  | GRMZM2G312226 | umc1166       | SSR          | 1.02a       | MpT                  | 15,080,522                         |             |
|    |               | bnlg1429      | SSR          | 1.02a       | MpT                  | 15,444,049                         |             |
| 3  | GRMZM2G134251 | S1_27303546   | SNP          | 1.02b       | MpB                  | 27,303,546                         |             |
|    |               | umc1070       | SSR          | 1.02b       | MpT                  | 17,660,941                         |             |
| 4  | GRMZM2G103668 | S1_85545046   | SNP          | 1.05        | MpB, MpT             | 85,545,046                         |             |
|    |               | GRMZM2G544531 | umc2025      | SSR         | 1.05                 | MpB                                | 91,415,861  |
| 5  | GRMZM2G162505 | S1_240766861  | SNP          | 1.08        | MpT                  | 240,766,861                        |             |
|    |               | GRMZM2G057093 | S1_240766882 | SNP         | 1.08                 | MpNC                               | 240,766,882 |
|    |               |               | S1_241404296 | SNP         | 1.08                 | MpVa                               | 241,404,296 |
|    |               |               | csu164       | SSR         | 1.08                 | MpVa                               | 250,092,343 |
| 6  | GRMZM2G051921 | bnlg108       | SSR          | 2.04        | MpB                  | 47,170,490                         |             |
| 7  | GRMZM2G051943 | S2_33534181   | SNP          | 2.04        | MpB                  | 33,534,181                         |             |
| 8  | GRMZM2G052175 | umc1018       | SSR          | 2.04        | MpB                  | unknown                            |             |
|    |               | GRMZM2G122708 | chi1MPVa     | InDel       | 2.04                 | MpT                                | 33,534,101  |
|    |               |               | ChiAMpVa     | InDel       | 2.04                 | MpVa                               | 33,534,101  |
|    |               | S2_33534181   | SNP          | 2.04        | MpB                  | 33,534,181                         |             |
| 9  | GRMZM2G403475 | S3_117291815  | SNP          | 3.04        | MpT                  | 117,291,815                        |             |
|    |               |               | umc1527      | SSR         | 3.04                 | MpB, MpT, MpVa                     | 118,064,950 |
|    |               |               | umc1773      | SSR         | 3.04                 | MpB, MpVa                          | 119,647,741 |
| 10 | GRMZM2G837822 | bnlg1350      | SSR          | 3.06        | MpT                  | 178,184,249                        |             |
|    |               | GRMZM2G430936 | umc2267      | SSR         | 3.06                 | MpT                                | 179,843,083 |
|    |               | GRMZM2G430942 |              |             |                      |                                    |             |
|    |               | GRMZM2G023650 |              |             |                      |                                    |             |
| 11 | GRMZM2G453805 | umc1320       | SSR          | 3.08        | MpT, MpVa            | 213,547,173                        |             |
|    |               | umc1140       | SSR          | 3.08        | MpVa                 | 209,639,614                        |             |
| 12 | GRMZM2G133781 | umc1288       | SSR          | 4.02        | MpT                  | 5,499,842                          |             |
|    |               | umc1294       | SSR          | 4.02        | MpNC                 | 6,602,430                          |             |
|    |               | umc1757       | SSR          | 4.02        | MpNC, MpT            | 4,753,629                          |             |
|    |               | php20725      | SSR          | 4.02        | MpVa                 | unknown                            |             |
| 13 | GRMZM2G358153 | umc2082       | SSR          | 4.03        | MpB                  | 12,044,070                         |             |
|    |               | nc005         | SSR          | 4.03        | MpT                  | 36,881,090                         |             |
|    |               | bnlg1126      | SSR          | 4.03        | MpNC                 | 11,310,311                         |             |
| 14 | GRMZM2G064360 | S5_63229609   | SNP          | 5.03        | MpT                  | 63,229,609                         |             |
| 15 | GRMZM2G389582 | S5_63229636   | SNP          | 5.03        | MpB, MpT, MpVa       | 63,229,636                         |             |
| 15 | GRMZM2G389557 | S5_63229609   | SNP          | 5.03        | MpT                  | 63,229,609                         |             |
| 16 | GRMZM2G129189 | umc1155       | SSR          | 5.05        | MpB, MpNC, MpT, MpVa | 180,186,573                        |             |
|    |               | umc1687       | SSR          | 5.05        | MpT, MpVa            | 180,186,573                        |             |
| 17 | GRMZM2G057766 | chi1_C5       | InDel        | 5.06        | MpT                  | 197,564,845                        |             |
| 18 | GRMZM2G141456 | umc1153       | SSR          | 5.08        | MpT                  | 205,552,861                        |             |
|    |               | umc108        | SSR          | 5.08        | MpVa                 | 204,605,587                        |             |
|    |               | umc2136       | SSR          | 5.08        | MpNC                 | unknown                            |             |
| 19 | GRMZM2G034598 | bnlg1165      | SSR          | 6.01a       | MpT                  | 27,494,827                         |             |
| 20 | GRMZM2G412577 |               |              |             |                      |                                    |             |

(Continued)

Table 2. (Continued)

| #  | Gene(s)       | Marker       | Marker Type | To test Bin | Population tested | Estimated start location of marker |
|----|---------------|--------------|-------------|-------------|-------------------|------------------------------------|
| 21 | GRMZM2G145518 | S6_82813940  | SNP         | 6.01b       | MpT               | 82,813,940                         |
| 21 | GRMZM2G447967 | csu183       | SSR         | 6.01b       | MpVa              | 89,127,346                         |
| 22 | GRMZM2G145461 |              |             |             |                   |                                    |
| 23 | GRMZM2G447795 | umc1250      | SSR         | 6.05        | MpVa              | 127,445,565                        |
|    |               | umc2580      | SSR         | 6.05        | MpB, MpNC         | 123,776,890                        |
| 24 | GRMZM2G162359 | S7_10547605  | SNP         | 7.01        | MpT               | 10,547,605                         |
| 24 | GRMZM2G162359 | S7_10652252  | SSR         | 7.01        | MpB, MpT, MpVa    | 10,652,252                         |
| 25 | GRMZM2G168364 | bnlg1070     | SSR         | 7.03        | MpT               | 132,596,480                        |
|    |               | umc1001      | SSR         | 7.03        | MpT               | 147,539,143                        |
|    |               | phi114       | SSR         | 7.03        | MpT               | 153,583,248                        |
|    |               | asg49        | SSR         | 7.03        | MpVa              | 129,865,901                        |
| 26 | GRMZM2G400497 |              |             |             |                   |                                    |
| 27 | GRMZM2G062974 | S8_88812804  | SNP         | 8.03a       | MpNC, MpVa        | 88,812,804                         |
|    |               | S8_88814131  | SNP         | 8.03a       | MpB               | 88,814,131                         |
| 28 | GRMZM2G083292 | bnlg666      | SSR         | 8.03b       | MpT               | 133,561,516                        |
|    |               | bnlg162      | SSR         | 8.03b       | MpB               | 133,561,516                        |
| 29 | GRMZM2G037694 | umc8.03      | SSR         | 8.03        | MpNC              | unknown                            |
|    |               | umc1141      | SSR         | 8.03c       | MpB, MpT, MpVa    | 138,860,175                        |
|    |               | umc2210      | SSR         | 8.03c       | MpB, MpVa         | 142,142,542                        |
| 30 | GRMZM2G117405 | S8_164558329 | SNP         | 8.03d       | MpT               | 164,558,329                        |
|    |               | S8_165558375 | SNP         | 8.03d       | MpT               | 165,558,375                        |
|    |               | S8_164558387 | SNP         | 8.03d       | MpT               | 164,558,387                        |
|    |               | umc2395      | SSR         | 8.03d       | MpB, MpT          | 164,963,371                        |
|    |               | umc2606      | SSR         | 8.03d       | MpT               | 164,445,025                        |
| 31 | GRMZM2G400999 | bnl3.04      | SSR         | 10          | MpVa              | 2,462,036                          |
|    |               | umc1291      | SSR         | 10          | MpT               | 2,462,036                          |
| 32 | GRMZM2G090441 | umc1246      | SSR         | 10.04a      | MpT               | 95,276,847                         |
|    |               | umc64        | SSR         | 10.04a      | MpVa              | 88,334,564                         |
|    |               | umc1589      | SSR         | 10.04a      | MpNC              | 102,366,287                        |
| 33 | GRMZM2G005633 | umc1053      | SSR         | 10.04b      | MpT               | 114,288,173                        |
|    |               | umc1506      | SSR         | 10.04b      | MpB               | 133,215,331                        |

Bin location and population in which the marker was segregating (and thus possible to map) is indicated.

doi:10.1371/journal.pone.0126185.t002

calculate LSMEANS of aflatoxin levels using a Generalized Linear Mixed Model (GLMM, [48]). Both log transformed and untransformed (but not quite normal) data were used in the association analysis. Genotyping of the 287 entries in the panel was done via Genotyping by Sequencing (GBS) according to [49]. A data subset consisting of 2000 SNPs was used to calculate population substructure using Structure 2.2 [50], and a kinship matrix using PowerMarker v. 3.25 [51] to correct for population substructure during association analysis using the mixed linear model (MLM) of TASSEL 3.0.1 [52, 53]. SNPs within the reported genetic sequences of the chitinase candidate genes (Table 1), or when necessary, within a +/- 15 Kb window, were extracted from the GBS dataset for association analysis and are listed in S3 Table and Fig 2. SNPs were filtered to remove those with a minor allele frequency of less than 5% before association analysis.



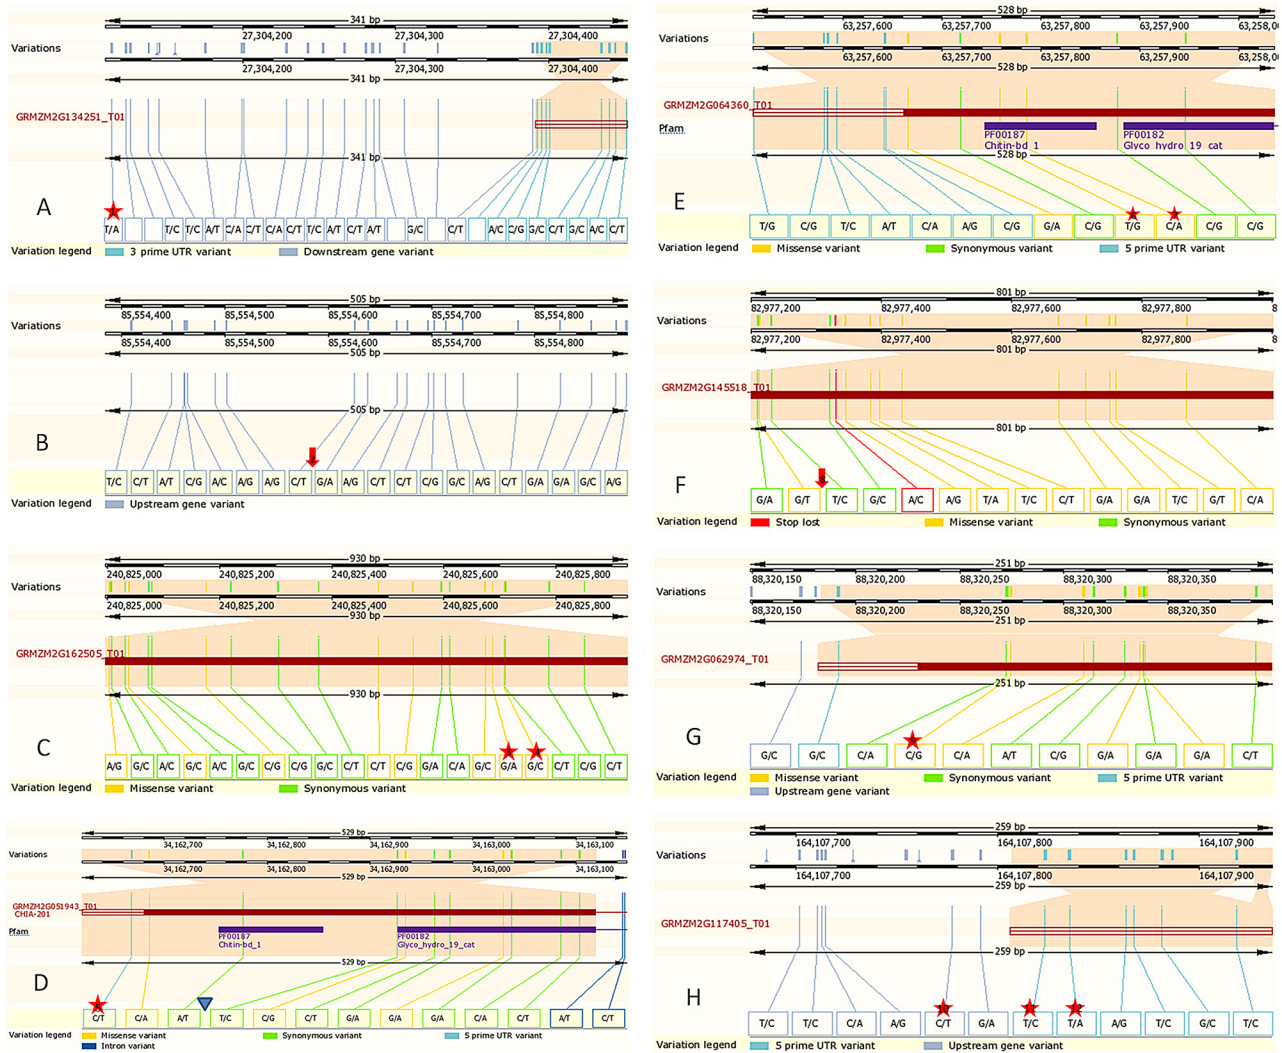

**Fig 2. The position of single nucleotide and insertion/ deletion polymorphisms studied within the chitinase gene sequences or within 500 bp of the gene position (Adapted from gramene.org [29]). Schematics of each gene are drawn from information from the MaizeGDB [28]. Other genes in the study not shown here were mapped using further up- or down-stream markers. Footnotes: (A) GRMZM2G134251; (B) GRMZM2G103668; (C) GRMZM2G162505; (D) GRMZM2G051943; (E) GRMZM2G064360; (F) GRMZM2G145518; (G) GRMZM2G062974; (H) GRMZM2G117405. Orange section is the gene of interest. Red stars and/or arrows indicate position of SNP used. (1) S1\_27303546, (2) S1\_85545046, (3) S1\_240766861, (4) S1\_240766882, (5) S2\_33534181, (6) S1\_63229609, (7) S1\_63229636, (8) S6\_82813940, (9) S8\_88812804, (10) S8\_164558329; (11) S8\_165558375; (12) S8\_164558387. Blue Triangle indicates position of insertion/ deletion polymorphism ChiAMPVa. SNP positions provided as (Maize B73 RefGen\_V2) adjusted to reflect correct position on image (Maize B73 RefGen\_V3).**

doi:10.1371/journal.pone.0126185.g002

## Results

### Identification and Characterization of Maize Chitinolytic Enzymes

The published literature and several online databases were searched to identify maize chitinase genes, and a total of 33 were identified. A brief description of each identified chitinase along with Gramene number, UniProt ID, and chromosomal position are found in [Table 1](#). Additional information on gene ontology and other identifiers for each gene can be found in [S1 Table](#). There were four instances where two genes appear in nearly identical chromosomal positions but lie on opposite strands of the DNA molecule: GRMZM2G103668 and GRMZM2G544531; GRMZM2G389582 and GRMZM2G359557; GRMZM2G145518 and GRMZM2G44

7967; and GRMZM2G052175 and GRMZM2G122708 (Table 1). There were also other discrepancies when examining information from different websites. For example, a chitinase polypeptide identified in the MaizeCYC database (AC211652.4\_FG003) shares a Uniprot ID (B4F9H4) and a protein reference sequence (NP\_00130521.1) with the chitinase gene GRMZM2G141456; however different chromosomal locations were reported for them (AC2116524\_FGP003 at Chromosome 4:20,448,273–20,449,744 and GRMZM2G141456 at chromosome 5:215,173,407–215,174,878). The dendrogram in Fig 1 finds them nearly identical, and thus, one of the reported genetic locations may be in error.

Some other sequences appeared in Fig 1 but not in our study. Three gene identifiers (GRMZM2G130686, GRMZM2G160265, and GRMZM2G080547) that share the same gene structure in Fig 1 as the GH18 chitinases actually share no significant similarity with other chitinase genes at the level of the exon sequences. Another gene identified as a chitinase by the Plant Intron Exon Comparison and Evolution (PIECE) database (AC193632.2\_FG002) has some similarity with the GH18 family chitinases, but the associated Uniprot ID K7TU58 appears to belong to the related protein kinase superfamily. GRMZM2G373106 is shown as a member of the GH-19 family; it may function differently as a lysozyme [28]. Though listed with the GH-20 family in Fig 1, GRMZM2G860235 does not appear in MaizeGDB database [28]. Also shown as a GH-20 family member is GRMZM2G121514, but different databases gave contradictory evidence regarding the function of this gene.

In some instances, several alleged chitinase genes with high percentages of homology were reported in the same region. On chromosome 3 from 176,597,396–176,678,080, 4 chitinase genes (GRMZM5G837822 (Hevamine A), GRMZM2G430936, GRMZM2G430942, and GRMZM2G023650) were reported by Monaco et al. [35]. Although they have slightly different gene structures (Fig 1), the exons were nearly identical, and thus only Hevamine A was included in this analysis. While there may actually be four tandemly arranged genes, if so, for the purposes of mapping they are all close enough together to include as one. In addition to the genes in Fig 1 that were not included in our study, there were six genes in our study that are not in Fig 1. This occurred because although the PIECE database did not identify them as chitinases, the Uniprot database did. These include GRMZM2G312226, GRMZM2G403475, GRMZM2G89557, GRMZM2G447967, GRMZM2G145461, and GRMZM2G037694. The search for maize chitinases at Uniprot also returned entry Q4VQ82, but gene ontology indicates that it was an rRNA N-glycosidase, EC = 3.2.2.22 [30, 32, 33] and it is not included in the study.

## Mapping

Each candidate gene sequence was tested via QTL mapping in at least one and up to four mapping populations. Single nucleotide polymorphisms or InDel markers were identified within the sequence of 31 of the 33 chitinase genes (Fig 2; S3 Table). Where SNP or InDel polymorphisms were identified between the parents of a linkage population and within the sequence of the gene itself, these were tested directly; however, in the following chromosomal regions a paucity of polymorphisms were encountered, due to lack of diversity or difficulty in accurate sequencing: 4:12072697–12094089; 5:63252951–63305101; 5:182518442–215229990; 6:71,462,625–71,463,278; 6:82793531–82835309; 6:129061004–129115221; and 8:144588215–144595174. These regions may not be sufficiently surveyed to draw definitive conclusions from association analysis, and closely linked SSR markers were used instead for QTL mapping in these locations (Table 2).

The results of the QTL mapping tests for each gene in each population in which they segregated are presented in Table 3, Fig 3, and S2 Fig. A SNP within the sequence of GRMZM2G103668 (in Bin 1.05) had the highest logarithm of the odds (LOD) score (9.2) in

**Table 3. Summary of QTL and candidate gene association mapping results.**

| #  | Gramene       | Description                                         | Bin  | # SNPs tested | # MLM assos. | Allele effect |          | QTL pops. | LOD | Pheno. Effect | Gene action | Max R <sup>2</sup> |
|----|---------------|-----------------------------------------------------|------|---------------|--------------|---------------|----------|-----------|-----|---------------|-------------|--------------------|
|    |               |                                                     |      |               |              | ave           | max      |           |     |               |             |                    |
| 1  | GRMZM2G099454 | Basic Endochitinase C                               | 1.01 | 10            | 2            |               |          | MpB       | ns  | ns            |             |                    |
|    |               |                                                     |      |               |              |               |          | MpT       | ns  | ns            |             |                    |
|    |               |                                                     |      |               |              |               |          | MpVa      | 3.8 | 0.664         |             |                    |
| 2  | GRMZM2G312226 | Chitinase Family Protein                            | 1.02 | 4             | 4            | 7.709         | 2.556    | MpB       | ns  | ns            |             |                    |
|    |               |                                                     |      |               |              |               |          | MpT       | ns  | ns            |             |                    |
| 3  | GRMZM2G134251 | Beta-hexosaminidase beta chain                      | 1.02 | 3             | 0            |               |          | MpB       | ns  | ns            |             |                    |
|    |               |                                                     |      |               |              |               |          | MpT       | ns  | ns            |             |                    |
| 4  | GRMZM2G103668 | Putative uncharacterized protein; CHIT14 precursor  | 1.05 | 4             | 1            | -54.356       | -358.606 | MpB       | ns  | ns            |             |                    |
|    |               |                                                     |      |               |              |               |          | MpT       | 9.2 | -0.335        |             |                    |
| 5  | GRMZM2G162505 | Chitinase 2                                         | 1.08 | 27            | 18           |               |          | MpT       | ns  | ns            |             |                    |
|    |               |                                                     |      |               |              |               |          | MpNC      | ns  | ns            |             |                    |
|    |               |                                                     |      |               |              |               |          | MpVa      | 2.6 | -0.276        |             |                    |
| 6  | GRMZM2G051921 | Putative uncharacterized protein; CHIT3 precursor   | 2.04 | 6             | 2            | -9.459        | -232.111 | MpB       | 5.4 | -0.313        | additive    | 0.089              |
|    |               |                                                     |      |               |              |               |          | MpT       | ns  | ns            |             |                    |
|    |               |                                                     |      |               |              |               |          | MpVa      | 4.8 | -0.354        | additive    | 0.241              |
| 7  | GRMZM2G051943 | Endochitinase A; SSR umc1783; CHIT3 precursor       | 2.04 | 7             | 10           |               |          | MpB       | 5.4 | -0.313        | additive    | 0.089              |
|    |               |                                                     |      |               |              |               |          | MpT       | ns  | ns            |             |                    |
|    |               |                                                     |      |               |              |               |          | MpVa      | 4.8 | -0.354        | additive    | 0.241              |
| 8  | GRMZM2G052175 | Endochitinase A; CHIT2 precursor                    | 2.04 | 7             | 10           |               |          | MpB       | 5.4 | -0.313        | additive    | 0.089              |
|    |               |                                                     |      |               |              |               |          | MpT       | ns  | ns            |             |                    |
|    |               |                                                     |      |               |              |               |          | MpVa      | 4.8 | -0.354        | additive    | 0.241              |
| 9  | GRMZM2G403475 | Putative uncharacterized protein                    | 3.04 | 4             | 1            |               |          | MpB       | 4.8 | -0.263        | additive    | 0.067              |
|    |               |                                                     |      |               |              |               |          | MpT       | ns  | ns            |             |                    |
|    |               |                                                     |      |               |              |               |          | MpVa      | ns  | ns            |             |                    |
| 10 | GRMZM5G837822 | Hevamine-A                                          | 3.06 | 4             | 0            |               |          | MpT       | 3.4 | -0.198        | additive    | 0.033              |
|    |               |                                                     |      |               |              |               |          | MpVa      | ns  | ns            |             |                    |
| 11 | GRMZM2G453805 | Prm3, chem5, chn1                                   | 3.08 | 12            | 0            |               |          | MpT       | ns  | ns            |             |                    |
|    |               |                                                     |      |               |              |               |          | MpVa      | ns  | ns            |             |                    |
| 12 | GRMZM2G133781 | Putative uncharacterized protein                    | 4.02 | 9             | 0            |               |          | MpNC      | ns  | ns            |             |                    |
|    |               |                                                     |      |               |              |               |          | MpT       | ns  | ns            |             |                    |
|    |               |                                                     |      |               |              |               |          | MpVa      | 3.7 | -0.190        |             |                    |
| 13 | GRMZM2G358153 | Chitinase 1; glycosyl hydrolase, putative           | 4.03 | 3             | 3            | 69.717        | 139.077  | MpB       | 2.4 | -0.184        | additive    | 0.122              |
|    |               |                                                     |      |               |              |               |          | MpNC      | ns  | ns            |             |                    |
|    |               |                                                     |      |               |              |               |          | MpT       | ns  | ns            |             |                    |
| 14 | GRMZM2G064360 | Basic endochitinase 1; CHIT4 precursor              | 5.03 | 3             | 1            |               |          | MpB       | 2.4 | -0.264        | additive    | 0.048              |
|    |               |                                                     |      |               |              |               |          | MpT       | 7.7 | -0.542        | additive    | 0.203              |
|    |               |                                                     |      |               |              |               |          | MpVa      | ns  | ns            |             |                    |
| 15 | GRMZM2G389582 | Chitinase; chn3; CHIT5 precursor, SSR umc1492       | 5.03 | 3             | 0            |               |          | MpB       | 2.4 | -0.264        | additive    | 0.048              |
|    |               |                                                     |      |               |              |               |          | MpT       | 7.7 | -0.542        | additive    | 0.203              |
|    |               |                                                     |      |               |              |               |          | MpVa      | ns  | ns            |             |                    |
| 16 | GRMZM2G129189 | Endochitinase PR4; Putative uncharacterized protein | 5.05 | 2             | 0            |               |          | MpB       | 2.6 | -0.189        | additive    | 0.091              |
|    |               |                                                     |      |               |              |               |          | MpNC      | ns  | ns            |             |                    |
|    |               |                                                     |      |               |              |               |          | MpT       | ns  | ns            |             |                    |
| 17 | GRMZM2G057766 | Chitinase 1                                         | 5.06 | 28            | 2            |               |          | MpT       | 2.3 | ns            |             |                    |
|    |               |                                                     |      |               |              |               |          |           |     |               |             |                    |

(Continued)

Table 3. (Continued)

| #  | Gramene                        | Description                                                                             | Bin   | # SNPs tested | # MLM assos. | Allele effect |          | QTL pops. | LOD  | Pheno. Effect | Gene action | Max R <sup>2</sup> |
|----|--------------------------------|-----------------------------------------------------------------------------------------|-------|---------------|--------------|---------------|----------|-----------|------|---------------|-------------|--------------------|
|    |                                |                                                                                         |       |               |              | ave           | max      |           |      |               |             |                    |
| 18 | GRMZM2G141456                  | Chitinase; Putative uncharacterized protein                                             | 5.08  | 3             | 2            | -73.007       | -387.263 | MpNC      | ns   | ns            |             |                    |
|    |                                |                                                                                         |       |               |              | 1*            | -73.007  | -387.263  | MpT  | 2.3           | ns          |                    |
|    |                                |                                                                                         |       |               |              |               |          |           | MpVa | ns            | ns          |                    |
| 19 | GRMZM2G034598                  | Beta-hexosaminidase beta chain                                                          | 6.01  | 19            | 5            | -29.092       | -102.631 | MpT       | ns   |               |             |                    |
| 20 | GRMZM2G412577                  | Uncharacterized protein                                                                 | 6.01  | 0             | 0            |               |          | MpT       | ns   | ns            |             |                    |
|    |                                |                                                                                         |       |               |              |               |          | MpVa      | 3.8  | -0.805        | dominant    | 0.070              |
| 21 | GRMZM2G145518                  | Putative uncharacterized protein                                                        | 6.01  | 5             | 0            |               |          | MpT       | ns   | ns            |             |                    |
|    |                                |                                                                                         |       |               |              |               |          | MpVa      | 3.8  | -0.805        | dominant    | 0.070              |
| 23 | GRMZM2G145461                  | Chitinase 2; chitinase candidate L00973; chn*-L00973, pCh2, uiu5 (chn), MZECHITC        | 6.01  | 5             | 0            |               |          | MpT       | ns   | ns            |             |                    |
|    |                                |                                                                                         |       |               |              |               |          | MpVa      | 3.8  | -0.805        | dominant    | 0.070              |
| 23 | GRMZM2G447795                  | Xylanase inhibitor protein 1                                                            | 6.05  | 5             | 0            |               |          | MpB       | 3.4  | 0.130         | additive    | 0.086              |
|    |                                |                                                                                         |       |               |              |               |          | MpNC      | ns   | ns            |             |                    |
|    |                                |                                                                                         |       |               |              |               |          | MpVa      | 2.7  | 0.858         | additive    | 0.017              |
| 24 | GRMZM2G328171<br>GRMZM2G162359 | Xylanase inhibitor protein 1<br>Putative uncharacterized protein                        | 7.01  | 24            | 1            |               |          | MpB       | ns   | ns            |             |                    |
|    |                                |                                                                                         |       |               |              |               |          | MpT       | ns   | ns            |             |                    |
| 25 | GRMZM2G168364                  | Endochitinase A2; Putative uncharacterized protein                                      | 7.03  | 13            | 2            |               |          | MpT       | ns   | ns            |             |                    |
|    |                                |                                                                                         |       |               |              |               |          | MpVa      | ns   | ns            |             |                    |
| 26 | GRMZM2G400497                  | Uncharacterized protein                                                                 | 8.00  | 3             | 1            | -5.65         | -7.246   | MpT       | ns   | ns            |             |                    |
|    |                                |                                                                                         |       |               |              |               |          | MpVa      | ns   | ns            |             |                    |
| 27 | GRMZM2G062974                  | Basic Endochitinase A                                                                   | 8.03  | 10            | 0            |               |          | MpB       | ns   | ns            |             |                    |
|    |                                |                                                                                         |       |               |              |               |          | MpNC      | ns   | ns            |             |                    |
|    |                                |                                                                                         |       |               |              |               |          | MpT       | ns   | ns            |             |                    |
|    |                                |                                                                                         |       |               |              |               |          | MpVa      | ns   | ns            |             |                    |
| 28 | GRMZM2G083292                  | Putative uncharacterized protein                                                        | 8.03  | 5             | 3            |               |          | MpB       | 2.4  | 0.170         | additive    | 0.074              |
|    |                                |                                                                                         |       |               |              |               |          | MpT       | ns   | ns            |             |                    |
| 29 | GRMZM2G037694                  | Hydrolase, hydrolyzing O-glycosyl compound, Chitinase; Putative uncharacterized protein | 8.03  | 0             | 0            |               |          | MpB       | 2.4  | 0.170         | additive    | 0.074              |
|    |                                |                                                                                         |       |               |              |               |          | MpNC      | ns   | ns            |             |                    |
|    |                                |                                                                                         |       |               |              |               |          | MpT       | ns   | ns            |             |                    |
|    |                                |                                                                                         |       |               |              |               |          | MpVa      | ns   | ns            |             |                    |
| 30 | GRMZM2G117405                  | Beta-hexosaminidase                                                                     | 8.03  | 17            | 11           | 52.308        | 246.477  | MpB       | 2.4  | 0.170         | additive    | 0.074              |
|    |                                |                                                                                         |       |               |              | 1*            | 52.308   | 246.477   | MpNC | ns            | ns          |                    |
|    |                                |                                                                                         |       |               |              |               |          | MpT       | ns   | ns            |             |                    |
|    |                                |                                                                                         |       |               |              |               |          | MpVa      | ns   | ns            |             |                    |
| 31 | GRMZM2G400999                  | Xylanase inhibitor protein 1                                                            | 10.0  | 11            | 0            |               |          | MpT       | ns   | ns            |             |                    |
|    |                                |                                                                                         |       |               |              |               |          | MpVa      | ns   | ns            |             |                    |
| 32 | GRMZM2G090441                  | Chitinase; Putative uncharacterized protein                                             | 10.04 | 4             | 0            |               |          | MpNC      | ns   | ns            |             |                    |
|    |                                |                                                                                         |       |               |              |               |          | MpT       | ns   | ns            |             |                    |
|    |                                |                                                                                         |       |               |              |               |          | MpVa      | ns   | ns            |             |                    |

(Continued)

Table 3. (Continued)

| #  | Gramene       | Description                         | Bin   | # SNPs tested | # MLM assos. | Allele effect |     | QTL pops. | LOD | Pheno. Effect | Gene action | Max R <sup>2</sup> |
|----|---------------|-------------------------------------|-------|---------------|--------------|---------------|-----|-----------|-----|---------------|-------------|--------------------|
|    |               |                                     |       |               |              | ave           | max |           |     |               |             |                    |
| 33 | GRMZM2G005633 | Endochitinase B Precursor; Fragment | 10.04 | 12            | 0            |               |     | MpNC      | ns  | ns            |             |                    |
|    |               |                                     |       |               |              |               |     | MpT       | ns  | ns            |             |                    |
|    |               |                                     |       |               |              |               |     | MpVa      | ns  | ns            |             |                    |

Number of markers tested, number of associations of  $p < 10^{-3}$  (and  $p < 10^{-4}$ , indicated with an asterisk) as calculated by MLM, the effect of the beneficial allele based on association mapping, the mapping populations in which at least one marker segregated and was mapped, the significance of the linkage mapping (LOD), the effect of the beneficial allele based on QTL mapping, the gene action, and R<sup>2</sup>, the maximum percentage of phenotypic variation explained by the QTL mapped, are all noted.

doi:10.1371/journal.pone.0126185.t003

population Mp715 x T173. In this population, before this SNP was mapped, there was no significant peak at this location, and after the addition of this SNP, a tall and very well defined QTL appeared in two environments and in the average of the environments, directly over the SNP (Fig 3). The QTL was associated with additive gene action, and the percentage of phenotypic variation explained by the QTL (R<sup>2</sup>) was 17.8%, a large amount for a quantitative trait and comparable to many of the largest QTL identified for aflatoxin resistance to date [54]. The allele reducing aflatoxin levels came from the resistant parent (Mp715).

Two other QTL were also identified with high LOD scores from the mapping of chitinase gene sequences (S2 Fig). GRMZM2G051921, GRMZM2G051943 and/or GRMZM2G052175

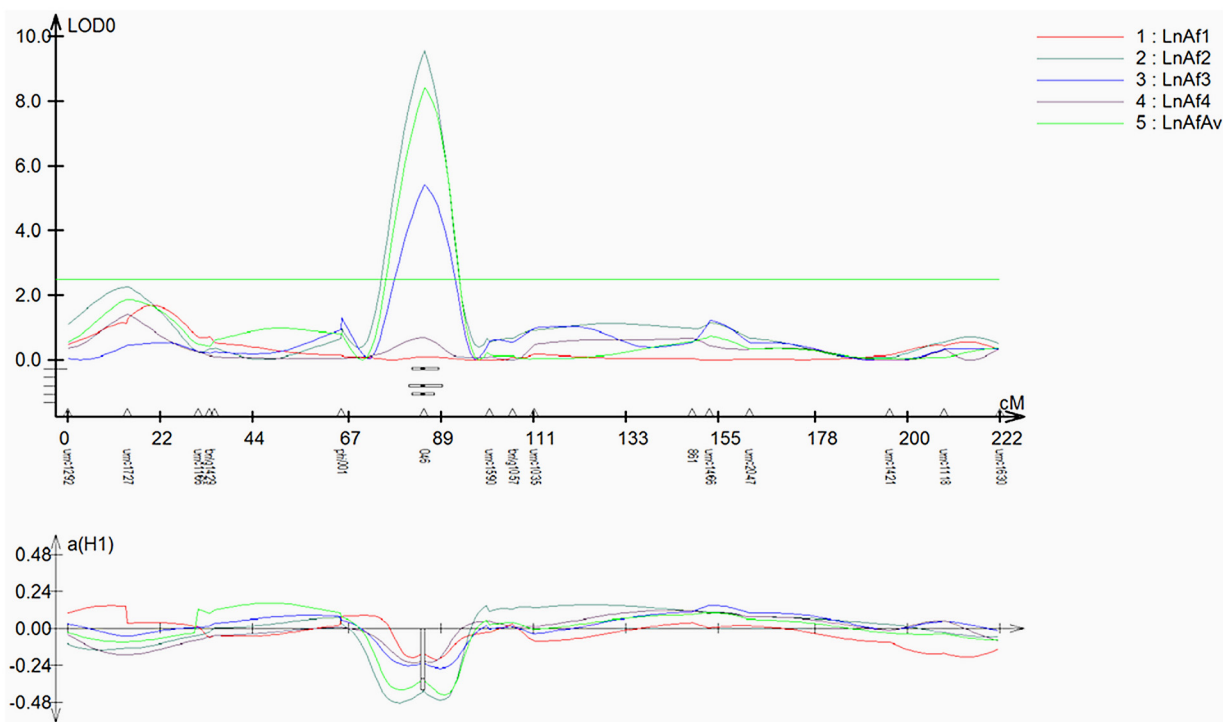

Fig 3. Linkage map from the F<sub>2:3</sub> mapping population of Mp715 x T173 (n = 192) showing the position of a new QTL on chromosome 1 centered over the SNP within the sequence of GRMZM2G103668 in bin 1.05, a GH19 protein with chitinase activity. The mapping population was phenotyped and genotyped originally according to [25].

doi:10.1371/journal.pone.0126185.g003



were associated with LOD scores up to 5.4 in two mapping populations. Although this QTL had been published previously [24, 27] it was not known that a chitinase gene may be the causative locus, and the current study allowed the QTL interval to be mapped to a smaller genetic window. The three genes, in bin 2.04, were only 30 Kb apart, and could not be distinguished in linkage mapping with populations of the size reported here (less than 300 individuals each). One or more of them may be responsible for increased aflatoxin accumulation resistance. The polymorphisms used to map the QTL included one SNP, two InDels, and one SSR, that fell within the sequences of GRMZM2G051943 and GRMZM2G052175. The resistance was associated with additive gene action in both populations and came from the resistant line Mp313E, and the QTL explained 24.1% of the phenotypic variation. The other QTL was centered over GRMZM2G064360, GRMZM2G389582 or GRMZM2G389557 in bin 5.03. This was also directly under the peak of a QTL published previously in two different mapping populations [25, 27], but again, it was not known that a chitinase could be the causative locus. This QTL was mapped with two SNPs within GRMZM2G064360 and one SSR from within the sequence of GRMZM2G389582, and because these 3 genes were all within a 48 Kb region, their genetic effect was indistinguishable. This QTL was found in population Mp715 x T173 with a LOD score of 7.7, an additive gene action, and explained 20.3% of the phenotypic variation. Resistance came from the resistant parent Mp715. A QTL in the same region was found in the Mp313E x B73 mapping population with a LOD of 2.4, also with additive gene action from the Mp313E resistant line, and explained 4.8% of the phenotypic variation.

Eight other QTL mapped within or very near other chitinase gene sequences in this study (S2 Fig). These QTL were not mapped with a LOD greater than 5, explained less than 5% of the phenotypic variation, were not reported in more than one mapping population, were not supported by association results, and/or were associated with dominant gene action, which is not as useful for plant breeding. These eight genes were GRMZM2G162505, GRMZM2G403475, GRMZM5G837822, GRMZM2G133781, GRMZM2G129189, GRMZM2G099454, GRMZM2G447795, and GRMZM2G117405. Resistance came from the susceptible parent in the last three cases. Information on all these additional QTL are reported in Table 3, and they may still be useful for plant breeding, especially if the three QTL of larger phenotypic effect and LOD scores have already been exploited in a breeding population.

For association analysis, there were 66 SNP-trait associations involving 15 chitinase candidate genes identified with the mixed linear model (MLM,  $8.98 \times 10^{-5} \leq p \leq 9.60 \times 10^{-3}$ ; Table 3; Fig 4). No SNPs could be found within 30 Kb of the sequence of GRMZM2G037694 or GRMZM2G412577, and only two SNPs within 30 Kb of GRMZM2G129189; therefore, conclusions cannot be made concerning these three genes via association analysis. At lower p values (below  $1 \times 10^{-4}$ ), five genes (GRMZM2G312226, GRMZM2G051921, GRMZM2G358153, GRMZM2G141456 and GRMZM2G117405) still show associations in one or more environments. The SNP in GRMZM2G051921 was supported by a QTL in two populations mapping at LOD scores of 5.0 and 4.8 from the resistant parent Mp313E. The associations with GRMZM2G358153 and GRMZM2G117405 were supported by QTL mapping at LOD scores of 2.4, both in MpB. The SNP from GRMZM2G141456 co-localized with a QTL in one population, but with a LOD of only 2.3, just below the critical threshold level. The SNP in GRMZM2G312226 was not supported by any QTL.

## Evolution of sequences

Several of the chitinase genes that were very close to each other appeared to be recent duplication events. Genes GRMZM2G051921, GRMZM2G051943 (ChiA), GRMZM2G052175, and GRMZM2G122708 all lay within a range of 50 Kb on chromosome 2. The first three genes



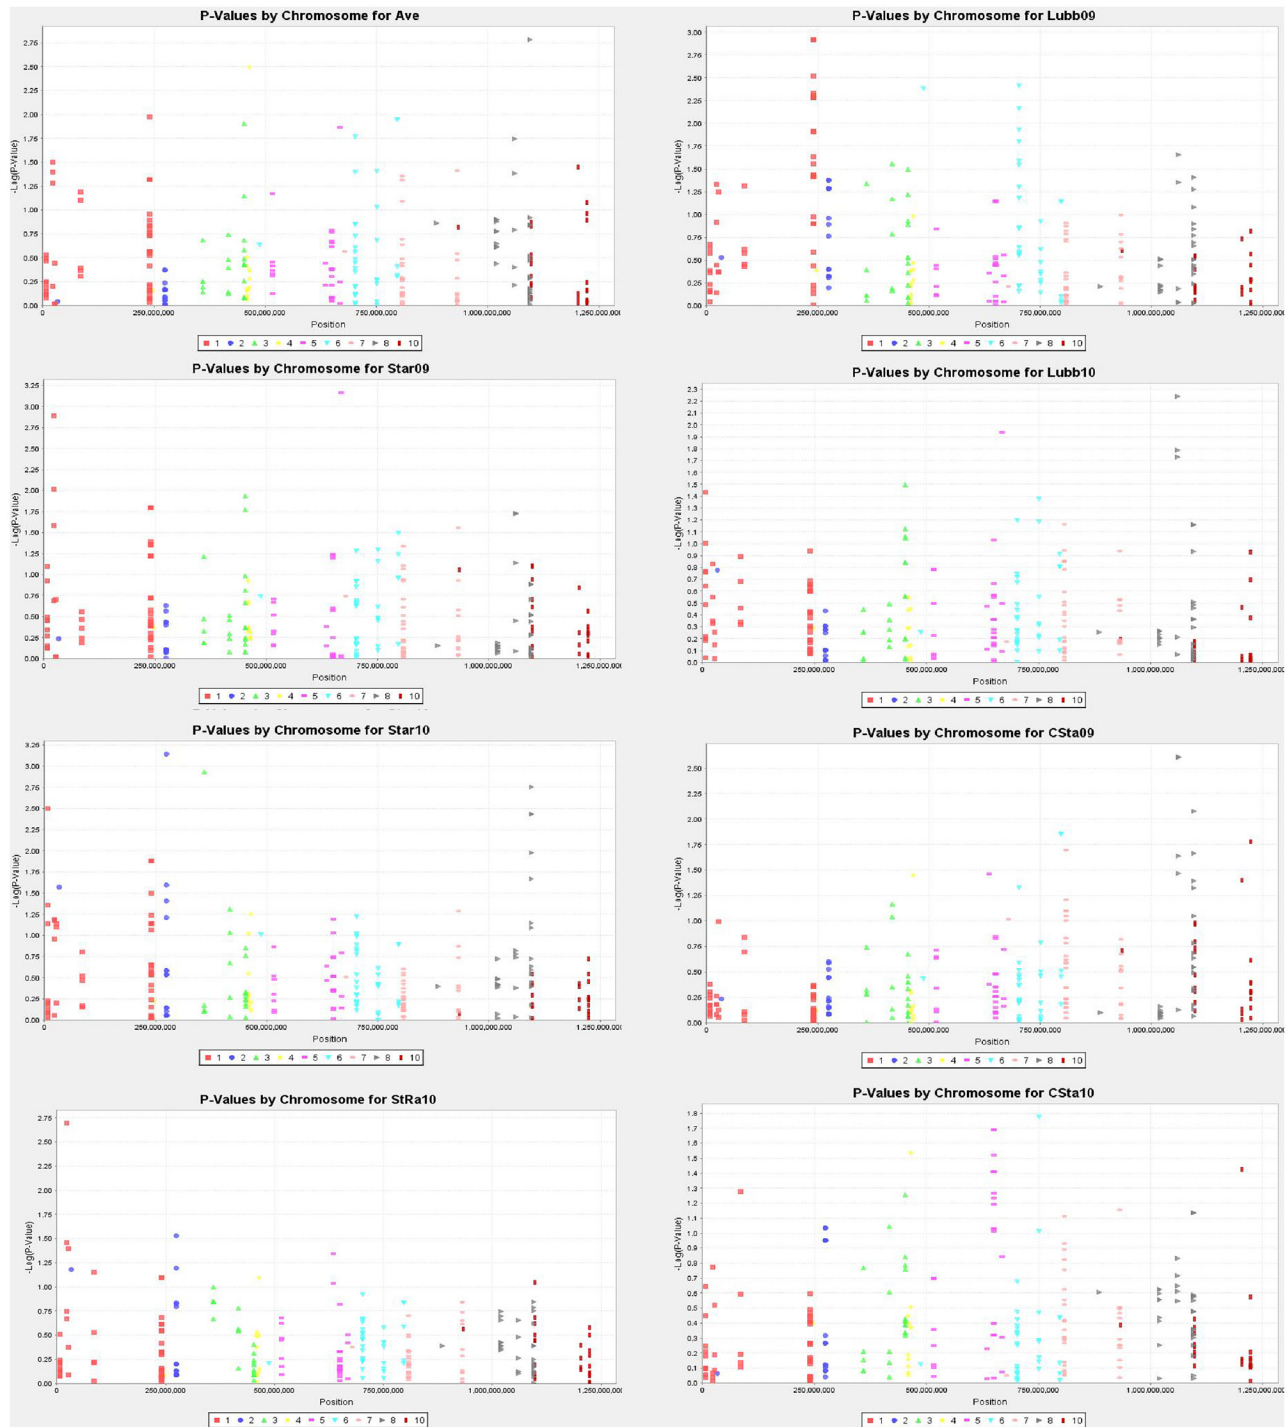

**Fig 4. Manhattan graph generated from the association analysis of SNPs extracted from the genetic sequence of 30 chitinase genes via TASSEL.** Each graph depicts the untransformed aflatoxin means in one environment, or averaged over all environments (Ave). Star09 = Starkville, 2009; Star10 = Starkville 2010; StRa10 = Starkville, Raymond site, 2010; Lubb09 = Lubbock, 2009; Lubb10 = Lubbock, 2010; CSta09 = College Station 2009; CSta10 = College Station 2010.

doi:10.1371/journal.pone.0126185.g004

shared significant sequence similarity and were used in a comparison analysis. The exon sequences of the three genes were aligned in pair-wise comparisons to generate a dot matrix view of similarity using the bl2seq specialized BLAST option from NCBI [36] (Fig 5). GRMZM2G051921 and GRMZM2G051943 have 2 exons, while GRMZM2G052175 has 3. The first two exons of GRMZM2G052175 and the first exon of GRMZM2G051943 were 86% similar. The third exon of GRMZM2G052175 and the second exon of GRMZM2G051943 were over 85% similar. The intronic sequence between the first two exons of GRMZM2G052175 was blasted against the Maize Transposable Elements Database (TEDB, [55]) and showed significant alignment with the transposable element RLC\_gudyeg\_AC206942-9404 (Expect =  $e^{-102}$ , Identities = 374/437 (85%)). It is therefore suggested that GRMZM2G052175 was a recent duplication of GRMZM2G051943 followed (or caused) by transposable element insertion into the first exon. The first exon of gene GRMZM2G051921 is over 75% similar to the first exon of GRMZM2G051943, and the second exons were over 85% similar. GRMZM2G051921 was thus also suspected to be a duplication of GRMZM2G051943, perhaps independently of the insertion of the TE that led to GRMZM2G052175. Both genes GRMZM2G051921 and GRMZM2G051943 have an identical expression pattern (S1 Fig); the expression data for GRMZM2G052175 appears in the coleoptiles at 6 days after silking versus expression in the germinating seed for GRMZM2G051921 and GRMZM2G051943.

The exons of other chitinase genes which appear to be closely related by the phylogenetic dendrogram (Fig 1) were also compared by alignment using the bl2seq Blast option from NCBI [36]. GRMZM2G057093 AND GRMZM2G162505 are 88% identical (Fig 5). These two genes lie on opposite strands of the DNA in nearly the same position on chromosome 1, Bin 1.08 (Table 1). GRMZM2G162359 and GRMZM2G328171 are 76% identical and lie on opposite strands of chromosome 7, bin 7.01 (Table 1). These pairs of genes may be the result of recent duplication events, possibly mediated by transposable elements. Exons 4 and 5 of GRMZM2G099454 are 78% identical to exons 1–3 of GRMZM2G103668; these genes are both on chromosome 1 but in different bins 1.01 and 1.05, respectively. The exons of GRMZM2G412577 and GRMZM2G400497 are 95% identical (Fig 5); these genes lie on different chromosomes, (6 and 8, respectively). Because these two gene pairs are not tandemly arranged nor fall within known duplicated segments of the maize genome, it is unknown why they show such high similarities. Similarities between other chitinase family genes are less than 75%.

## Discussion

A genomewide atlas of chitinase transcription during maize development was generated using expression data from two different sources [39–41] (S1 Fig). Data from these expression studies may provide clues as to how the chitinase genes increase *A. flavus* resistance. For example, gene GRMZM2G145461 was highly expressed in silk and husk tissue, and may be a defense for the developing ear against corn ear worm and fall armyworm, which enter the developing ear through the silk channel or directly through the husk. At the same time, the feeding insects may introduce *A. flavus* into the ear and are known vectors of the fungus. This gene was not identified as highly associated with resistance to aflatoxin accumulation or *A. flavus*, and only moderately linked to resistance in one QTL mapping population; however, since all phenotyping of these populations involved the direct injection of spores into the developing ear, any silk or husk resistance against the fungus contributed by this gene would have been overcome and thus not measured in this study. Genes GRMZM2G057766 and GRMZM2G083292 were active primarily in roots, and may provide defense against corn root worm, nematodes, and/or soil borne pathogenic fungi. These two genes were also not associated nor linked to aflatoxin levels in corn grain, and based on the tissues in which they were expressed, were not expected to be.

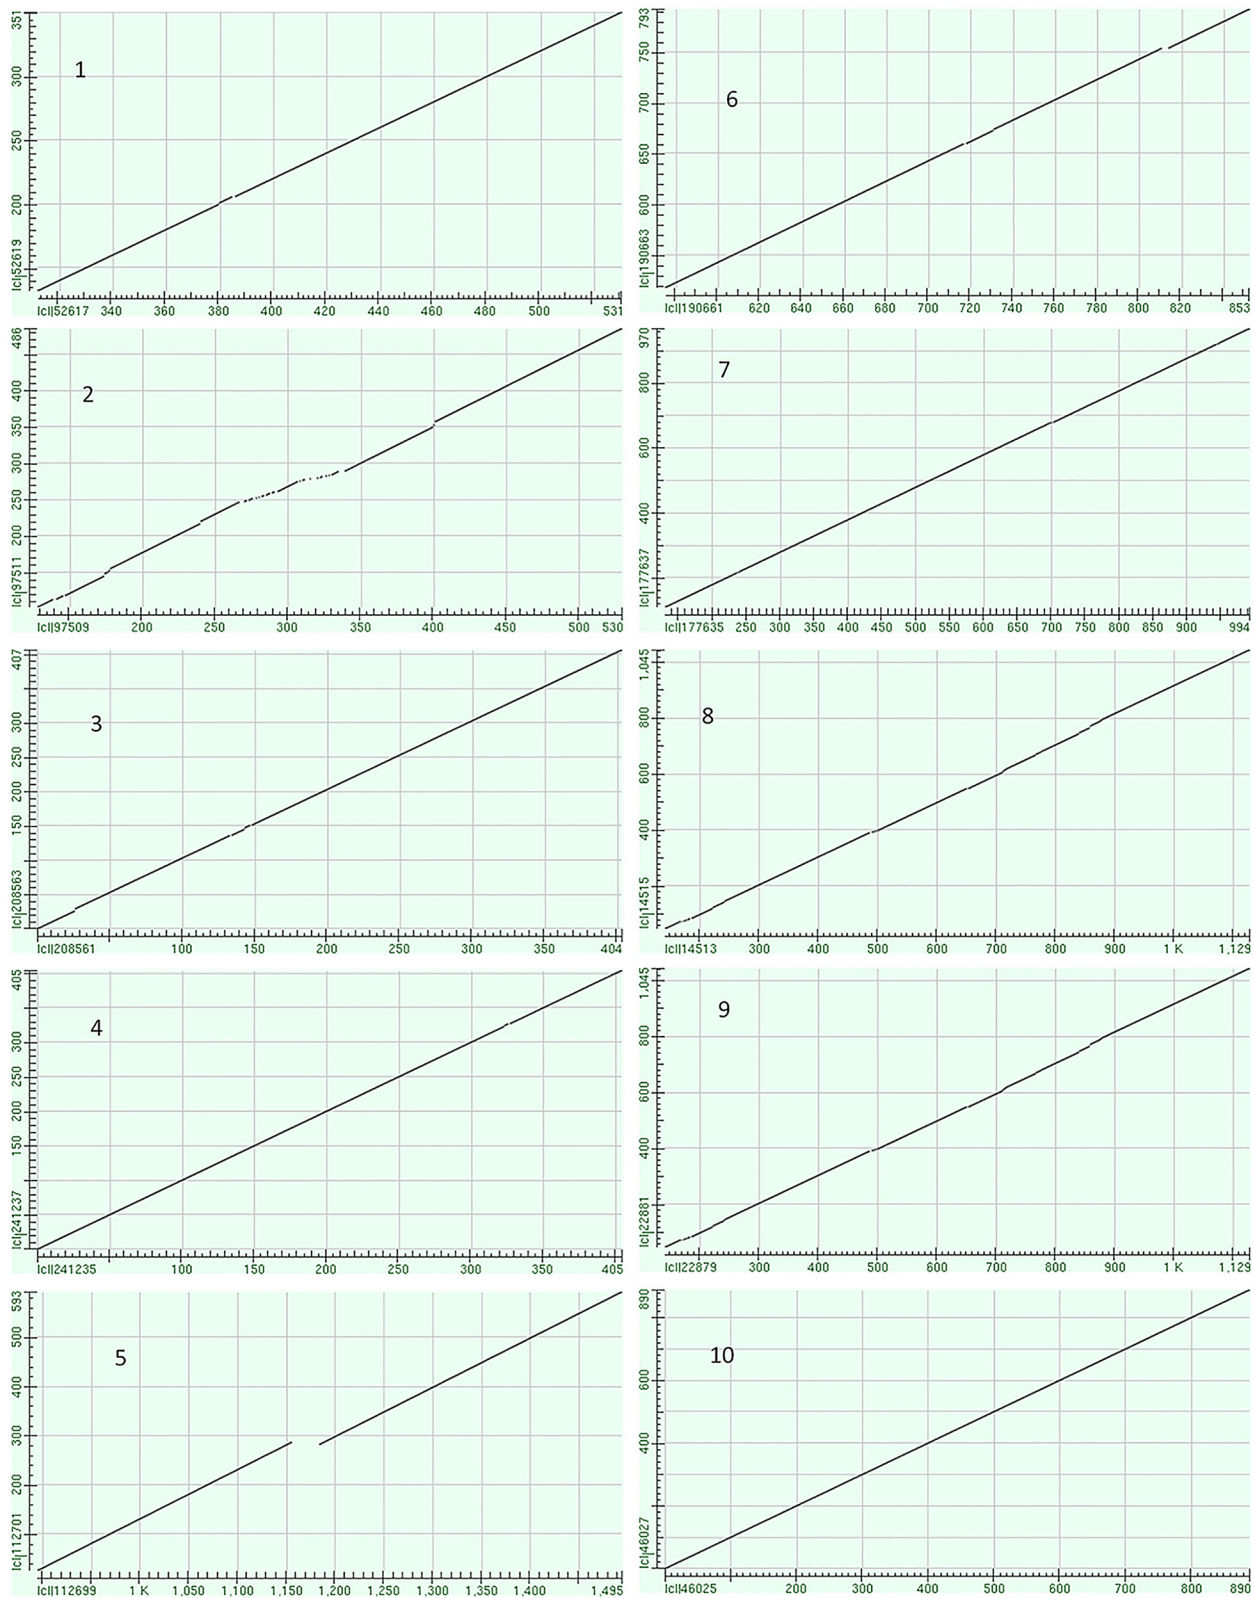

**Fig 5. Dot matrix view of paired alignments of maize chitinase exon sequences with similar gene structures, based on the dendrogram in Fig 1.** 1 = GRMZM2G051943 (Exon 1) vs. GRMZM2G052175 (exons 1 and 2) (86% identical); 2 = GRMZM2G051943 (Exon 1) vs. GRMZM2G051921 (exon 1) (77% identical); 3 = GRMZM2G051943 (Exon 2) vs. GRMZM2G052175 (exon 3) (85% identical); 4 = GRMZM2G051943 (Exon 2) vs. GRMZM2G051921

(exon 2) (87% identical); 5 = Exons 1 and 2 GRMZM2G412577 vs. GRMZM2G400497 (95% identical); 6 = Exons 4 and 5 of GRMZM2G099454 vs. exons 1–3 of GRMZM2G103668 (78% identical); 7 = GRMZM2G057093 VS GRMZM2G162505 (88% identical); 8 = GRMZM2G162359 VS GRMZM2G328171 (76% identical); 9 = GRMZM2G400999 VS GRMZM2G447795 (81% identical); 10 = GRMZM2G080547 VS GRMZM2G160265 (98% identical).

doi:10.1371/journal.pone.0126185.g005

On the other hand, gene GRMZM2G312226 was constitutively expressed at high levels in all maize tissues studied. A SNP in GRMZM2G312226 was the second most highly associated with aflatoxin levels in the grain. Maize lines with the resistant allele of this SNP had aflatoxin levels equal to the mean of all lines in the panel, while lines with the susceptible allele of the SNP had highly increased levels of toxin (Table 3). This suggested that the susceptible SNP corresponded to an allele that interfered with the gene function of GRMZM2G312226 and reduced the background protection provided by constitutive expression. Genes GRMZM2G103668, GRMZM2G051921/ GRMZM2G052175, and GRMZM2G064360/ GRMZM2G389582/ GRMZM2G389557 were associated or linked to increased resistance. These genes were expressed very little or not at all in any tissues measured in [39–41] and the beneficial allele may be increasing gene expression in resistant lines only (which were, unfortunately, not included in the expression atlas study) to increase resistance following inoculation by *A. flavus* spores. This possibility would have to be investigated in a new gene expression study of resistant lines. Genes GRMZM2G051943 (highly expressed in germinating seed but not developing seed), GRMZM2G141456 (somewhat expressed in germinating seed and immature leaves) and GRMZM2G117405 (highly expressed in anthers and tassels) may likewise owe their increased resistance to a mechanism specific to these tissues.

Some of the results observed in the present study agree with previous reports. Germinating maize embryos have shown an induction of two acidic chitinase isozymes (no specific gene or protein identifier reported) in response to infection by the fungus *F. moniliforme* [15]. A chitinase isolated from mature seeds of the *A. flavus* resistant line Tex6 inhibits the growth of *A. flavus* [56]. Although the exact identity of this chitinase was not specified, it was highly similar to the homologous chitinases A and B. Commercial hybrids have been shown to produce two different forms of the ChitA (GRMZM2G051943) and the Chit B (GRMZM2G005633) proteins, due to either difference in the genetic sequences or post-translational modifications [57, 58]. Both forms of ChitA and ChitB appear to be modified by proteases from the fungi *Bipolaris zeicola*, *Stenocarpella maydis* and *Fusarium verticillioides*; this leads to a reduction of chitinase function and allows the fungi to overcome host barriers [57–59]. A chitinase A gene in bin 2.04 (GRMZM2G051943 and/or GRMZM2G052175, thus possibly ChitA) was associated with a large aflatoxin reducing QTL in the present study.

The effect of the beneficial allele of some of the genes mapped in this study was large enough to justify the creation of near isogenic or transgenic lines, or knock-out mutants, to verify gene effect in an independent background. Validation of these genes in independent tests and genetic backgrounds is now underway. The QTL at GRMZM2G103668 in bin 1.05 (at LOD 9.2) explained 18% of the phenotypic variation for aflatoxin level in the mapping population. The QTL in bin 2.04 attributable to one of the linked genes (at LOD 5.5) explains 24% of the phenotypic variation in one population and 9% in a second, related population. Finally, the QTL in bin 5.03 attributable to one of three linked genes (at LOD 7.7) explains 20% of the phenotypic variation in one population and 5% in an unrelated population. The QTL at 2.04 and 5.03 have been seen before in related germplasm, and represent stable resistance factors that are useful across environments. The QTL at 1.05 is new, and must be further verified before stable resistance can be ensured. These QTL are certainly of large enough phenotypic effect to attempt to backcross into susceptible varieties, singly or together, in an attempt to increase resistance, and



near isogenic lines are currently being created using the SNP and SSR markers within the genes (Table 2).

As measured by antifungal activity, endochitinases have greater activity than exochitinases; however, the enzymes are synergistic. Thus a combination of exo- and endochitinases is several-fold more active than any single enzyme [60]. The most significantly associated SNPs from QTL mapping and also from the association analysis may be pyramided via SNPs reported in Tables 2 and 3 and may boost resistance even higher than expected from the phenotypic effect calculated from single genes. Markers for marker assisted selection of genes identified via association analysis include the SNPs in the genes in bin 1.02 ( $p = 3.78E-04$ ,  $R^2 = 5\%$ ); 2.04 ( $p = 7.24E-04$ ,  $R^2 = 5\%$ , already suggested above due to QTL information); 4.03 ( $p = 8.98E-05$ ,  $R^2 = 6\%$ ); 5.08 ( $p = 6.84E-04$ ,  $R^2 = 4\%$ ); and 8.03 ( $p = 9.22E-04$ ,  $R^2 = 4\%$ ). The frequency of the resistance-contributing allele can be seen in Table 3. This information can give some indication as to the utility of each of these SNPs in a general breeding program, as alleles already very common in the population may be less useful in general, although may help increase resistance in specific genetic backgrounds.

## Supporting Information

**S1 Fig. Genome wide atlas of chitinase transcription during maize development adapted from Sekhon et al. [40] and Qteller [39] sorted by chromosomal position for each gene listed in Table 1.** a = Similar Expression information from Qteller; b = Qteller indicates greater expression in the undifferentiated ear, appears to be constitutively expressed; c = Expression levels are very low from the Qteller output; d = Very low expression in Qteller; e = Qteller indicates high expression levels in the ear, silks, tassel, and/ or roots; f = Conflicting results, appears to be constitutive in Sekhon, but more expressed in the seeds in Qteller. Expression levels are low for both; g = Not studied in Qteller; h = Not studied by Sekhon et al. (DOCX)

**S2 Fig. Linkage maps of four QTL mapping populations showing the QTL reported previously and new QTL attributed to the chitinase genes characterized in this study.** The mapping populations, and previous references for them, are: MpT = Mp715 x T173 (Warburton et al., 2011); MpB = Mp313E x B73 (Brooks et al., 2005); MpVa = Mp313E x Va35 (Willcox et al., 2013); MpNC = Mp717 x NC300 (Warburton et al., 2009). New markers used to test the chitinase genes are shown with a red circle. (DOCX)

**S1 Table. Gene Ontology and other sequence identifiers and associated information, including those from protein, messenger RNA, and pathway databases.** (XLSX)

**S2 Table. Full length genomic and protein sequences from the MaizeGDB [27] and Uniprot [31, 33] databases.** (XLSX)

**S3 Table. All SNPs extracted from the sequence of the chitinase genes within the association mapping panel.** (XLSX)

## Acknowledgments

The authors wish to acknowledge Jack Haynes, Haijun Liu, Fanny Liu for excellent laboratory technical assistance; and Drs. P. Dowd and D. Luthe for their constructive critical review

of this manuscript. This paper is a joint contribution of USDA-ARS and the Mississippi Agricultural and Forestry Experiment Station and is published as Journal No. J-12656 of the Miss. Agric. and Forestry Exp. Stn.

Disclaimer: Mention of tradenames or commercial products is solely for the purpose of providing specific information and does not imply recommendation or endorsement by USDA.

## Author Contributions

Conceived and designed the experiments: LKH GLW WPW MLW. Performed the experiments: LKH JEM DAO JSS SO MLW. Analyzed the data: LKH WPW MLW. Contributed reagents/materials/analysis tools: LKH JEM GLW WPW MLW. Wrote the paper: LKH MLW.

## References

1. Castells M, Marin S, Sanchis V, Ramos A. Distribution of fumonisins and aflatoxins in corn fractions during industrial cornflake processing. *Int J Food Micro*. 2008; 123:81–7. doi: [10.1016/j.ijfoodmicro.2007.12.001](https://doi.org/10.1016/j.ijfoodmicro.2007.12.001) PMID: [18261815](https://pubmed.ncbi.nlm.nih.gov/18261815/)
2. Betran F, Isakeit T. Aflatoxin accumulation in maize hybrids of different maturities. *Agronomy Journal*. 2004; 96:565–70.
3. Cleveland T, Dowd P, Desjardins A, Bhatnagar D, Cotty P. United States Department of Agriculture-Agricultural Research Service research on pre-harvest prevention of mycotoxins and mycotoxigenic fungi in US crops. *Pest Manag Sci*. 2003; 59:629–42. PMID: [12846313](https://pubmed.ncbi.nlm.nih.gov/12846313/)
4. Food and Agriculture Organization of the United Nations. Worldwide regulations for mycotoxins in food and feed in 2003. Food and Agriculture Organization of the United Nations Food and Nutrition Paper 81. Rome; 2004.
5. United States Food and Drug Administration. Mycotoxins in Domestic and Imported Foods CPG 7307.001. United States Food and Drug Administration; 2008.
6. Warburton ML, Brooks TD, Windham GL, Williams WP. Identification of QTL Contributing Resistance to Aflatoxin Accumulation in Maize. *Mol Breed*. 2011; 27:491–9.
7. van Loon LC, Rep M, Pieterse CM. Significance of inducible defense-related proteins in infected plants. *Annu Rev Phytopathol*. 2006; 44:135–62. PMID: [16602946](https://pubmed.ncbi.nlm.nih.gov/16602946/)
8. Boller T. Hydrolytic enzymes in plant disease resistance. In: Kosuge T N E, editor. *Plant-Microbe Interactions*. 2. New York, NY: Macmillan; 1987. p. 385–413.
9. Bravo JM, Campo S, Murillo I, Coca M, Segundo BS. Fungus- and wound-induced accumulation of mRNA containing a class II chitinase of the pathogenesis-related protein 4 (PR-4) family of maize. *Plant Molecular Biology*. 2003; 52:745–59. PMID: [13677464](https://pubmed.ncbi.nlm.nih.gov/13677464/)
10. Shores M, Harman GE. Genome-wide identification, expression and chromosomal location of the genes encoding chitinolytic enzymes in *Zea mays*. *Mol Genet Genomics*. 2008; 280:173–85. doi: [10.1007/s00438-008-0354-1](https://doi.org/10.1007/s00438-008-0354-1) PMID: [18560892](https://pubmed.ncbi.nlm.nih.gov/18560892/)
11. Tiffin P. Comparative evolutionary history of chitinase genes in the Genus *Zea* and the Family Poaceae. *Genetics*. 2004; 167:1331–40. PMID: [15280246](https://pubmed.ncbi.nlm.nih.gov/15280246/)
12. Wu S, Kriz AL, Widholm JM. Molecular analysis of two cDNA clones encoding acidic class I chitinase in maize. *Plant Physiol*. 1994; 105:1097–105. PMID: [7972490](https://pubmed.ncbi.nlm.nih.gov/7972490/)
13. Cietus J, Balasubramanian V, Vashist D, Sakthivel N. Transgenic expression of plant chitinases to enhance disease resistance. *Biotechnol Lett*. 2013; 35:1719–32. doi: [10.1007/s10529-013-1269-4](https://doi.org/10.1007/s10529-013-1269-4) PMID: [23794096](https://pubmed.ncbi.nlm.nih.gov/23794096/)
14. Shaikh SZ, Deshpande MV. Chitinolytic enzymes: their contribution to basic and applied research. *World J Microbiol Biotechnol*. 1993; 9:468–75. doi: [10.1007/BF00328035](https://doi.org/10.1007/BF00328035) PMID: [24420114](https://pubmed.ncbi.nlm.nih.gov/24420114/)
15. Cordero M, Raventos D, Segundo BS. Differential expression and induction of chitinases and B-1-3-glucanases in response to fungal infection during germination of maize seeds. *MPMI*. 1994; 7(1):23–31.
16. Kasprezewska A. Plant Chitinases-Regulation and Function. *Cell Mol Biol Lett*. 2003; 8:809–24. PMID: [12949620](https://pubmed.ncbi.nlm.nih.gov/12949620/)
17. Bekesiova B, Hraska S, Libantova J, Moravcikova J, Matusikova I. Heavy-metal stress induced accumulation of chitinase isoforms in plants. *Mol Biol Rep*. 2008; 35:579–88. PMID: [17701287](https://pubmed.ncbi.nlm.nih.gov/17701287/)
18. Henrissat B, Davies G. Structural and sequence-based classification of glycoside hydrolases. *Curr Opin Struct Biol*. 1997; 7(637–644). PubMed Central PMCID: PMC PMID: 9345621. PMID: [9345621](https://pubmed.ncbi.nlm.nih.gov/9345621/)



19. Peethambaran B, Hawkins LK, Windham GL, Williams WP, Luthe DS. Anti-fungal activity of maize silk proteins and role of chitinases in *Aspergillus flavus* resistance. *Toxin Reviews*. 2009; 29(1):27–39. doi: [10.1080/01942630802574825](https://doi.org/10.1080/01942630802574825) PMID: [19197757](https://pubmed.ncbi.nlm.nih.gov/19197757/)
20. Brown RL, Chen Z, Menkir A, Cleveland TE. Proteomics to identify resistance factors in corn—a review. *Mycotoxin Research*. 2006; 22:22–6. doi: [10.1007/BF02954553](https://doi.org/10.1007/BF02954553) PMID: [23605497](https://pubmed.ncbi.nlm.nih.gov/23605497/)
21. Flint-Garcia S, Thuillet A, Yu J, Pressoir G, Romero S, Mitchell S, et al. Maize association population: a high-resolution platform for quantitative trait locus dissection. *Plant J*. 2005; 44:1054–64. PMID: [16359397](https://pubmed.ncbi.nlm.nih.gov/16359397/)
22. Remington DL, Thornsberry JM, Matsuoka Y, Wilson LM, Whitt SR, Doebley J, et al. Structure of linkage disequilibrium and phenotypic associations in the maize genome. *PNAS*. 2001; 98:11479–84. PMID: [11562485](https://pubmed.ncbi.nlm.nih.gov/11562485/)
23. Warburton ML, Williams WP, Windham GL, Murray SC, Xu W, Hawkins LK, et al. Phenotypic and genetic characterization of a maize association mapping panel developed for the identification of new sources of resistance to *Aspergillus flavus* and aflatoxin accumulation. *Crop Sci*. 2013; 53(6):2374–83.
24. Brooks T, Williams WP, Windham GL, Willcox M, Abbas HK. Quantitative trait loci contributing resistance to aflatoxin accumulation in the maize inbred Mp313E. *Crop Sci*. 2005; 45:171–4.
25. Warburton ML, Brooks TD, Krakowsky MD, Shan X, Windham GL, Williams WP. Identification and Mapping of New Sources of Resistance to Aflatoxin Accumulation in Maize. *Crop Sci*. 2009; 49:1403–8.
26. Warburton ML, Williams WP, Hawkins L, Bridges S, Gresham C, Harper J, et al. A public platform for the verification of the phenotypic effect of candidate genes for resistance to aflatoxin accumulation and *Aspergillus flavus* infection in maize. *Toxins*. 2011; 3:754–65. doi: [10.3390/toxins3070754](https://doi.org/10.3390/toxins3070754) PMID: [22069738](https://pubmed.ncbi.nlm.nih.gov/22069738/)
27. Willcox MC, Davis GL, Windham GL, Abbas HK, Betrán J, Holland JB, et al. Confirming quantitative trait loci for aflatoxin resistance from Mp313E in different genetic backgrounds. *Mol Breed*. 2013; 32:15–26.
28. Lawrence C, Harper L, Shaeffer M, Sen T, Seigfried T, Campbell D. Maize GDB: The Maize Model Organism Database for Basic, Translational, and Applied Research. *Int J Plant Genomics*. 2008;496957. doi: [10.1155/2008/496957](https://doi.org/10.1155/2008/496957) PMID: [18769488](https://pubmed.ncbi.nlm.nih.gov/18769488/)
29. Jaiswal P, Yap I, Ware D, Spooner W, Youens-Clark K, Ren L, et al. Gramene: a bird's eye view of cereal genomes. *Nucleic Acids Res*. 2006;(D717–D723). PMID: [16381966](https://pubmed.ncbi.nlm.nih.gov/16381966/)
30. Apweiler R, Bateman A, Martin MJ, O'Donovan C, Magrane M, Alam-Faruque Y., et al. Activities at the Universal Protein Resource (UniProt). *Nucleic Acids Res*. 2014; 42:D191–D8. doi: [10.1093/nar/gkt1140](https://doi.org/10.1093/nar/gkt1140) PMID: [24253303](https://pubmed.ncbi.nlm.nih.gov/24253303/)
31. Hunter S, Jones P, Mitchell A, Apweiler R, Attwood TK, Bateman A, et al. InterPro in 2011: new developments in the family and domain prediction database. *Nucleic Acids Res*. 2012; 40:D306–D12. doi: [10.1093/nar/gkr948](https://doi.org/10.1093/nar/gkr948) PMID: [22096229](https://pubmed.ncbi.nlm.nih.gov/22096229/)
32. Acland A, Agarwala A, Barrett T, Beck J, Benson DA, Bollin C, et al. Database resources of the National center for Biotechnology. *Nucleic Acids Res*. 2013; 41:D8–D20. doi: [10.1093/nar/gks1189](https://doi.org/10.1093/nar/gks1189) PMID: [23193264](https://pubmed.ncbi.nlm.nih.gov/23193264/)
33. Pontius J, Wagner L, Schuler G. UniGene: a unified view of the transcriptome. In: *Information NCfB, editor. The NCBI Handbook*. Bethesda, MD: National Center for Biotechnology Information; 2003.
34. Lombard V, Ramula HG, Drula E, Coutinho P, Henrissat B. The Carbohydrate-active enzymes database (CAZy) *Nucleic Acids Res*. 2014; 42(D490–d495). PubMed Central PMCID: [24270786](https://pubmed.ncbi.nlm.nih.gov/24270786/). doi: [10.1093/nar/gkt1178](https://doi.org/10.1093/nar/gkt1178) PMID: [24270786](https://pubmed.ncbi.nlm.nih.gov/24270786/)
35. Monaco MK, Sen TZ, Dharmawardhana PD, Ren L, Shaeffer ML. Maize metabolic network construction and transcriptome analysis. *Plant Gen*. 2014. doi: [10.3835/plantgenome2012.9.0025](https://doi.org/10.3835/plantgenome2012.9.0025)
36. Johnson M, Zaretskaya I, Raytselis Y, Merezukh Y, McGinnis S, Madden TL. NCBI BLAST: a better web interface. *Nucleic Acids Res*. 2008; 35:W5–W9.
37. Finn RD, Bateman A, Clements J, Coggill P, Eberhardt RY, Eddy SR, et al. Pfam: the protein families database. *Nucleic Acids Research*. 2013; 32:D138–D41. doi: [10.1093/nar/gkh121](https://doi.org/10.1093/nar/gkh121) PubMed Central PMCID: [PMC308855](https://pubmed.ncbi.nlm.nih.gov/PMC308855/). PMID: [14681378](https://pubmed.ncbi.nlm.nih.gov/14681378/)
38. Wang Y, You FM, Lazo GR, Luo M-C, Thilmony R, Gordon S, et al. PIECE: a database for plant gene structure comparison and evolution. *Nucleic Acids Res*. 2013; 41:D1159–D66. doi: [10.1093/nar/gks1109](https://doi.org/10.1093/nar/gks1109) PMID: [23180792](https://pubmed.ncbi.nlm.nih.gov/23180792/)
39. Schnable J, Thompson A. qTeller: Simple Tool to identify genes under your QTL. Available: <http://qteller.com/> Accessed 28 Jan 2014.
40. Sekhon RS, Lin H, Childs KL, Hansey CN, Buell CR, Leon Nd, et al. Genome-wide atlas of transcription during maize development. *Plant J*. 2011; 66:553–63. doi: [10.1111/j.1365-313X.2011.04527.x](https://doi.org/10.1111/j.1365-313X.2011.04527.x) PMID: [21299659](https://pubmed.ncbi.nlm.nih.gov/21299659/)

41. Winter D, Vinegar B, Nahal H, Ammar R, Wilson GV, et al. An "Electronic Fluorescent Pictograph" browser for exploring and analyzing large-scale biological data sets. *PLoS One* 2007; 2(8):e718. doi: [10.1371/journal.pone.0000718](https://doi.org/10.1371/journal.pone.0000718) PMID: [17684564](https://pubmed.ncbi.nlm.nih.gov/17684564/)
42. Zummo N, Scott GE. Cob and kernel infection by *Aspergillus flavus* and *Fusarium moniliforme* in inoculated, field-grown maize ears. *Plant Dis.* 1990; 74(9):627–30.
43. Windham GL, Williams WP. *Aspergillus flavus* infection and aflatoxin accumulation in resistant and susceptible maize hybrids. *Plant dis.* 1998; 82(3):281–4. PMID: [21807332](https://pubmed.ncbi.nlm.nih.gov/21807332/).
44. Ooijen Jv. JoinMap 4: Software for the calculation of genetic linkage maps in experimental populations. Wageningen, Netherlands: Kyazma B.B.; 2006.
45. Wang S, Basten C, Zeng Z-B. Windows QTL Cartographer 2.5. Raleigh, NC: Department of Statistics, North Carolina State University; 2012.
46. Doerge RW, Churchill GA. Permutation tests for multiple loci affecting a quantitative character. *Genetics.* 1996; 142:285–94. PMID: [8770605](https://pubmed.ncbi.nlm.nih.gov/8770605/)
47. Inc. SI. Base SAS 9.2 Procedures Guide. Cary, NC: SAS Institute Inc., 2009.
48. McCullagh P, Nelder JA. Generalized Linear Models. 2 ed. Boca Raton: Chapman and Hall/CRC; 1989. 511 p.
49. Elshire RJ, Glaubitz JC, Sun Q, Poland JA, Kawamoto K, Buckler ES, et al. A Robust, Simple Genotyping-by-Sequencing (GBS) Approach for High Diversity Species 2011. 6(5):e19379.[Available from: doi: [10.1371/journal.pone.0019379](https://doi.org/10.1371/journal.pone.0019379) PMID: [21573248](https://pubmed.ncbi.nlm.nih.gov/21573248/)
50. Pritchard JK, Stephens M, Donnelly P. Inference of population structure using multilocus genotype data. *Genetics.* 2000; 155:945–59. PMID: [10835412](https://pubmed.ncbi.nlm.nih.gov/10835412/)
51. Liu K, Muse S. PowerMarker: an integrated analysis environment for genetic marker analysis. *Bioinformatics.* 2005; 21:2128–9. PMID: [15705655](https://pubmed.ncbi.nlm.nih.gov/15705655/)
52. Bradbury PJ, Zhang Z, Kroon DE, Casstevens TM, Ramdoss Y, Buckler ES. TASSEL: Software for association mapping of complex traits in diverse samples. *Bioinformatics.* 2007; 23:2633–5. PMID: [17586829](https://pubmed.ncbi.nlm.nih.gov/17586829/)
53. Yu J, Pressoir G, Briggs WH, Vroh BI, Yamasaki M, Doebley JF, et al. A unified mixed-model method for association mapping that accounts for multiple levels of relatedness. *Nat Genet.* 2006; 38(2):203–8. PMID: [16380716](https://pubmed.ncbi.nlm.nih.gov/16380716/)
54. Mideros SX, Warburton ML, Jamann TM, Windham GL, Williams WP, Nelson RJ. Quantitative trait loci for resistance to *Aspergillus* ear rot: analysis by linkage mapping, characterization of near-isogenic lines and meta-analysis. *Crop Sci.* 2014; 54:127–42.
55. Wessler SR, Bennetzen JL, Dawe RK, Jiang N, SanMiguel P, Freeman B. Maize Transposable Element Database 2009. Available: <http://maizetdb.org/~maize/>, Accessed 25 Feb 2014.
56. Moore KG, Price MS, Boston RS, Weissinger AK, Payne GA. A chitinase from Tex6 maize kernels inhibits growth of *Aspergillus flavus*. *Phytopathology.* 2004; 94:82–7. doi: [10.1094/PHYTO.2004.94.1.82](https://doi.org/10.1094/PHYTO.2004.94.1.82) PMID: [18943823](https://pubmed.ncbi.nlm.nih.gov/18943823/)
57. Naumann TA, Wicklow DT, Kendra DF. Maize seed chitinase is modified by a protein secreted by *Bipolaris zeicola*. *Physiological and molecular plant pathology.* 2009; 74:134141.
58. Naumann TA, Wicklow DT. Allozyme-specific modification of a maize seed chitinase by a protein secreted by the fungal pathogen *Stenocarpella maydis*. *Phytopathology.* 2010; 100:645–54. doi: [10.1094/PHYTO-100-7-0645](https://doi.org/10.1094/PHYTO-100-7-0645) PMID: [20528182](https://pubmed.ncbi.nlm.nih.gov/20528182/)
59. Naumann TA, Wicklow DT, Price NPJ. Identification of a chitinase-modifying protein from *Fusarium verticillioides*. *The journal of biological chemistry.* 2011; 286(41):35358–66. doi: [10.1074/jbc.M111.279646](https://doi.org/10.1074/jbc.M111.279646) PMID: [21878653](https://pubmed.ncbi.nlm.nih.gov/21878653/)
60. Shores M, Harman GE. Differential expression of maize chitinases in the presence or absence to *Trichoderma harzianum* strain T22 and indications of a novel exo-endo-heterodimeric chitinase activity. *BMC Plant Biology.* 2010; 10:136. doi: [10.1186/1471-2229-10-136](https://doi.org/10.1186/1471-2229-10-136) PMID: [20594307](https://pubmed.ncbi.nlm.nih.gov/20594307/)
