# Supplementary material for: Characterization of the Maize Chitinase Genes and Their Effect on Aspergillus flavus and Aflatoxin Accumulation Resistance
Source: PLoS One. 2015 Jun 19;10(6):e0126185. doi: 10.1371/journal.pone.0126185 (PMC4475072; doi:10.1371/journal.pone.0126185)
Supplement: S1 Table — (XLSX) [file pone.0126185.s003.xlsx]

## Sheet: Table S1
	Supplemental Table 1 : Gene Ontology and other Gene Identifiers
#	Glycoside Hydrolase Family	Gramene	Description	GO Annotation		Enzymatic Reaction		NCBI Reference Sequence Identifiers			Entrez-gene	Unigene	UniProt	MaizeCyc	Length		MW of polypeptide
							EC Number	Nucleotide	mRNA	Protein					bp	aa
1	GH-19	GRMZM2G099454	CHIT16- chitinase family protein precursor, expressed	Biological Process:	GO:0005975 - carbohydrate metabolic process	Chitinase	3.2.1.14		NM 001137022.1	NP 001130494.1	LOC100191592	Zm.67336	B4F9D5	GBWI-82391	1087
					GO:0006032 - chitin catabolic process				NM 001154745.1	NP 001148217.1	LOC100281825	Zm.96529	B6T6W1
					GO:0016998 - cell wall macromolecule catabolic process								B6SZC6
				Molecular Function:	GO:0004568 - chitinase activity								C0HEI0
													C0P3M6
2	GH-19	GRMZM2G312226	Chitinase family protein	Biological Process:	GO:0006032 - chitin catabolic process	Chitinase	3.2.1.14							GBWI-82863	1131	436
					GO:0016998 - cell wall macromolecule catabolic process
				Molecular Function:	GO:0004568 - chitinase activity
3	GH-20	GRMZM2G134251	Beta-hexosaminidase beta chain Putative uncharacterized protein	Biological Process:	GO:0005975 - carbohydrate metabolic process	Beta-N-acetylhexosaminidase	3.2.1.52		NM 001153110.1	NP 001146582.1	LOC100280178	Zm.15748	B4F7Z2	GBWI-82962	1880
				Molecular Function:	GO:0004553 - hydrolase activity, hydrolyzing O-glycosyl compounds								B8A2C4
					GO:0004563 - beta-N-acetylhexosaminidase activity
4	GH-19	GRMZM2G103668	CHIT14- chitinase family protein precursor, expressed Hypothetical protein LOC100275812 Pseudogene	Biological Process:	GO:0005975 - carbohydrate metabolic process	Chitinase	3.2.1.14		NM 001149806.1	NP 001143278.1	LOC100275812	Zm.10257	B6SZN3	GBWI-84184	857
					GO:0006032 - chitin catabolic process
		GRMZM2G544531			GO:0016998 - cell wall macromolecule catabolic process
				Molecular Function:	GO:0004568 - chitinase activity
5	GH-18	GRMZM2G162505	Chitinase 2	Biological Process:	GO:0005975 - carbohydrate metabolic process	Chitinase	3.2.1.14		NM_001158529.1	NP_001152001.1	LOC100285638	Zm.9675	B4G1L5	GBWI-86581	930	309	33.704 kD
					GO:0006032 - chitin catabolic process								B6U7J7
		GRMZM2G057093		Molecular Function:	GO:0004553 - hydrolase activity, hydrolyzing O-glycosyl compounds
					GO:0004568 - chitinase activity
6	GH-19	GRMZM2G051921	Chitinase, AC186025.4 FG008, Putative uncharacterized protein CHIT3-chitinase family protein precursor, expressed	Biological Process:	GO:0005975 - carbohydrate metabolic process	Chitinase	3.2.1.14	AC186025	NM 001176611.1	NP 001170082.1	LOC100384000	Zm.127433	C0PKN5	GBWI-78456	977
					GO:0006032 - chitin catabolic process							Zm.141937
					GO:0016998 - cell wall macromolecule catabolic process
				Molecular Function:	GO:0004568 - chitinase activity
					GO:0008061 - chitin binding
7	GH-19	GRMZM2G051943	Endochitinase A precursor/ chitinase cta1, chiA, chita, chitinase A1, gnp_QBG19a05a, gpm460a, SSR umc1783 CHIT3-chitinase family protein precursor, expressed	Biological Process:	GO:0005975 - carbohydrate metabolic process	Chitinase	3.2.1.14		NM 001156000.1	NP 001149472.1	LOC100283098	Zm.119908	P29022	GBWI-78457	946
					GO:0006032 - chitin catabolic process				NM 00165432.1	NO 001158904.1	LOC100303798	Zm.137976	D0EM57
					GO:0007186 - G-protein coupled receptor signaling pathway							Zm.92797	B6TEL0
					GO:0016998 - cell wall macromolecule catabolic process								B4FTS6
				Molecular Function:	GO:0004568 - chitinase activity
					GO:0004994 - somatostatin receptor activity
					GO:0008061 - chitin binding
				Cellular Component:	GO:0016021 - integral to membrane
8	GH-19	GRMZM2G052175	Endochitinase A umc1783 CHIT2-chitinase family protein precursor, expressed	Biological Process:	GO:0005975 - carbohydrate metabolic process	Chitinase	3.2.1.14	M84164	NM 001154737.1		LOC100281817	Zm.21431	B6SZA3	GBWI-78458	1923	640
					GO:0006032 - chitin catabolic process
		GRMZM2G122708			GO:0016998 - cell wall macromolecule catabolic process
				Molecular Function:	GO:0004568 - chitinase activity
9	GH-18	GRMZM2G403475	Glycosyl hydrolase, putative, expressed	Biological Process:	GO:0005975 - carbohydrate metabolic process	Chitinase	3.2.1.14		NM 001151372.1	NP 001144844.1	LOC100277930	Zm.126281	B6U1W5	GBWI-74692	978	325	34.545 kD
					GO:0006032 - chitin catabolic process
				Molecular Function:	GO:0004553 - hydrolase activity, hydrolyzing O-glycosyl compounds
					GO:0004568 - chitinase activity
10	GH-18	GRMZM5G837822	Hevamine-A, glycosyl hydrolase	Biological Process:	GO:0005975 - carbohydrate metabolic process	Chitinase	3.2.1.14		NM 001157470.1	NP 001150942.1	LOC100284575	Zm.32462	B6TVA3	GBWI-75705	936	311
		GRMZM2G430936			GO:0006032 - chitin catabolic process
		GRMZM2G430942		Molecular Function:	GO:0004553 - hydrolase activity, hydrolyzing O-glycosyl compounds
		GRMZM2G023650			GO:0004568 - chitinase activity
11	GH-18	GRMZM2G453805	Prm3, chem5, chn1	Biological Process:	GO:0005975 - carbohydrate metabolic process	Chitinase	3.2.1.14		NM 001112071.1	NP 001105541.1	LOC101027098	Zm.95692	P93518	GBWI-76667	888	295
					GO:0006032 - chitin catabolic process				NM_001279467.1				B4G1T3
				Molecular Function:	GO:0004553 - hydrolase activity, hydrolyzing O-glycosyl compounds
					GO:0004568 - chitinase activity
12	GH-18	GRMZM2G133781	Glycosyl Hydrolase, Putative uncharacterized protein	Biological Process:	GO:0005975 - carbohydrate metabolic process	Chitinase	3.2.1.14		NM 001147323.1	NP 001140795.1	LOC100272870	Zm.9615	B4FR99	GBWI-69110	972	323
				Molecular Function:	GO:0004553 - hydrolase activity, hydrolyzing O-glycosyl compounds							Zm.115298
					GO:0004568 - chitinase activity
13	GH-18	GRMZM2G358153	Chitinase 1, Glycosyl hydrolase Putative uncharacterized protein	Biological Process:	GO:0005975 - carbohydrate metabolic process	Chitinase	3.2.1.14		NM 001137742.1	NP 001131214.1	LOC100192522	Zm.24099	B4FBN8	GBWI-69201	861	286	31.128 kD
					GO:0006032 - chitin catabolic process
				Molecular Function:	GO:0004553 - hydrolase activity, hydrolyzing O-glycosyl compounds
					GO:0004568 - chitinase activity
14	GH-19	GRMZM2G064360	Basic endochitinase 1 CHIT4-chitinase family protein precursor, epxressed	Biological Process:	GO:0006032 - chitin catabolic process	Chitinase	3.2.1.14		NM 001156110.1	NP 001149582.1	pco104428a	Zm.1765	B6TFQ3	GBWI-65892	861	286
					GO:0016998 - cell wall macromolecule catabolic process
				Molecular Function:	GO:0004568 - chitinase activity
					GO:0008061 - chitin binding
15	GH-19	GRMZM2G389582	Chitinase chn3, Clone 304975 mRNA sequence CHIT5-chitinase family protein precursor, expressed	Biological Process:	GO:0006032 - chitin catabolic process						MZECHITINA	Zm.201	Q41795	GBWI-65894	489	162	17.583 kD
		GRMZM2G389557			GO:0016998 - cell wall macromolecule catabolic process							Zm.131471		GBWI-65893	807	238
				Molecular Function:	GO:0004568 - chitinase activity
16	GH-19	GRMZM2G129189	Endochitinase PR4, Putative uncharacterized protein CHIT1-chitinase family protein precursor, expressed	Biological Process:	GO:0005975 - carbohydrate metabolic process	Chitinase	3.2.1.14		NM 001157282.1	NP 001150754.1	LOC100284387	Zm.67134	B6TT00	GBWI-67602	884
					GO:0006032 - chitin catabolic process							Zm.95681
					GO:0016998 - cell wall macromolecule catabolic process
				Molecular Function:	GO:0004568 - chitinase activity
					GO:0008061 - chitin binding
17	GH-18	GRMZM2G057766	Chitinase 1, Glycosyl hydrolase Putative uncharacterized protein	Biological Process:	GO:0005975 - carbohydrate metabolic process	Chitinase	3.2.1.14		NM 001154758.1	NP 001148230.1	LOC100281838	Zm.28325	B6SZG2	GBWI-67961	861	286
					GO:0006032 - chitin catabolic process
				Molecular Function:	GO:0004553 - hydrolase activity, hydrolyzing O-glycosyl compounds
					GO:0004568 - chitinase activity
18	GH-18	GRMZM2G141456	Chitinase, chn2, AC211652.4_FGP003 Putative uncharacterized protein	Biological Process:	GO:0005975 - carbohydrate metabolic process	Chitinase			NM_001137049.1	NP_001130521.1	LOC100191620	Zm.19305	B4F9H4	GBWI-68668	1472
					GO:0006032 - chitin catabolic process						LOC100191621
				Molecular Function:	GO:0004553 - hydrolase activity, hydrolyzing O-glycosyl compounds
					GO:0004568 - chitinase activity
19	GH-20	GRMZM2G034598	Beta-hexosaminidase beta chain	Biological Process:	GO:0005975 - carbohydrate metabolic process	Beta-N-acetylhexosaminidase	3.2.1.52		NM 001154111.1	NP 001147583.1	TIDP3459	Zm.1436	B6ST04	GBWI-61405	13436
				Molecular Function:	GO:0004553 - hydrolase activity, hydrolyzing O-glycosyl compounds							Zm.150099
					GO:0004563 - beta-N-acetylhexosaminidase activity
					GO:0045735 - nutrient reservoir activity
20	GH-19	GRMZM2G412577	Uncharacterized Protein	Biological Process:	GO:0006032 - chitin catabolic process	Chitinase	3.2.14						K7UKQ3	GBWI-61776	630	209
					GO:0016998 - cell wall macromolecule catabolic process
				Molecular Function:	GO:0004568 - chitinase activity
21	GH-19	GRMZM2G145518	Putative Uncharacterized protein CHIT4-chitinase family protein precursor, expressed	Biological Process:	GO:0005975 - carbohydrate metabolic process	Chitinase	3.2.1.14		NM 001153068.1	NP 001146540.1	LOC100280135	Zm.11654	B8A247	GBWI-61929	1140	379
					GO:0006032 - chitin catabolic process								K7ULF7
					GO:0016998 - cell wall macromolecule catabolic process
		GRMZM2G447967		Molecular Function:	GO:0004568 - chitinase activity
					GO:0008061 - chitin binding
22	GH-19	GRMZM2G145461	chitinase candidateL00973, chn*-L00973, pCh2, uiu5(chn), MZECHITC CHIT4-chitinase family protein precursor, expressed	Biological Process:	GO:0006032 - chitin catabolic process	Chitinase	3.2.1.14		NM_001157088.1	NP 001105314.1	LOC100274400	Zm.847	Q41794	GBWI-61931	786	261
					GO:0016998 - cell wall macromolecule catabolic process				NM 001111844.1	NP 001142232.1		Zm.119216	B4G0Q3
				Molecular Function:	GO:0004568 - chitinase activity				NM 001148760.1			Zm.136803	K7UGV4
					GO:0008061 - chitin binding
23	GH-18	GRMZM2G447795	Xylanase inhibitor protein 1	Biological Process:	GO:0005975 - carbohydrate metabolic process	Chitinase	3.2.1.14		NM 001158189	NP 001151661.1	LOC100285296	Zm.96646	B6U2X8	GBWI-62943	972	323	35.337 kD
				Molecular Function:	GO:0004553 - hydrolase activity, hydrolyzing O-glycosyl compounds
					GO:0004568 - chitinase activity
24	GH-18	GRMZM2G328171	Xylanase inhibitor protein 1	Biological Process:	GO:0005975 - carbohydrate metabolic process				NM_001153398.1	NP_001146870.1	LOC100280478	Zm.21556	B6SGT3	GBWI-58063
		GRMZM2G162359		Molecular Function:	GO:0004553 - hydrolase activity, hydrolyzing O-glycosyl compounds				NM 001148840.1	NP 001142312.1	LOC100274481	Zm.84867	B4G1C2	GBWI-58064
												Zm.137589
25	GH-19	GRMZM2G168364	Endochitinase A2 Putative uncharacterized protein CHIT13-chitinase family protein precursor, expressed	Biological Process:	GO:0006032 - chitin catabolic process	Chitinase	3.2.1.14		NM 001148862.1	NP 001142334.1	LOC100274504	Zm.3726	B4G1H3	GBWI-59572	1162
					GO:0016998 - cell wall macromolecule catabolic process								C0P306
				Molecular Function:	GO:0004568 - chitinase activity
26	GH-19	GRMZM2G400497	Uncharacterized Protein	Biological Process:	GO:0005975 - carbohydrate metabolic process	Chitinase	3.2.14						K7VNG7	GBWI-54199	858	285	31.267
					GO:0006032 - chitin catabolic process
					GO:0016998 - cell wall macromolecule catabolic process
				Molecular Function:	GO:0004568 - chitinase activity
27	GH-19	GRMZM2G062974	Basic Endochitinase A HIT17-chitinase family protein precursor, expressed	Biological Process:	GO:0005975 - carbohydrate metabolic process				NM 001157088.1	NP 001150560.1	LOC100284192	Zm.24175	B6TR38	GBWI-55502	1172
					GO:0006032 - chitin catabolic process						umc1302		K7UYP8
					GO:0016998 - cell wall macromolecule catabolic process								K7VEQ3
				Molecular Function:	GO:0004568 - chitinase activity
					GO:0008061 - chitin binding
28	GH-19	GRMZM2G083292	Chitinase family protein	Biological Process:	GO:0005975 - carbohydrate metabolic process	Chitinase
					GO:0006032 - chitin catabolic process		3.2.1.14							GBWI-56222	936	311	33.782 kD
					GO:0016998 - cell wall macromolecule catabolic process
				Molecular Function:	GO:0004568 - chitinase activity
29	GH-18	GRMZM2G037694	Chitinase domain-containing protein 1 precursor, putative	Biological Process:	GO:0006032 - chitin catabolic process	Chitinase	3.2.1.14		NM_001136775.1.	NP_001130247.1	LOC100191341	Zm.20286.	B4F8H2	GBWI-56570
				Molecular Function:	GO:0004568 - chitinase activity
30	GH-20	GRMZM2G117405	Beta-hexosaminidase	Biological Process:	GO:0005975 - carbohydrate metabolic process				NM 001150765.1	NP 001144237.1	LOC10277104	Zm.12507	C0PLT8	GBWI-57195	4639
				Molecular Function:	GO:0004553 - hydrolase activity, hydrolyzing O-glycosyl compounds				NM 001176717.1	NP 001170188.1	LOC100384136	Zm.155461	B6TP85
					GO:0004563 - beta-N-acetylhexosaminidase activity								B6TTE2
31	GH-18	GRMZM2G400999	Xylanase inhibitor protein 1	Biological Process:	GO:0005975 - carbohydrate metabolic process	Chitinase	3.2.1.14		NM 001158228.1	NP 001151700.1	LOC100285336	Zm.133462	B6U3V2	GBWI-48407	948	315	34.177 kD
				Molecular Function:	GO:0004553 - hydrolase activity, hydrolyzing O-glycosyl compounds
					GO:0004568 - chitinase activity
32	GH-18	GRMZM2G090441	Chitinase Putative uncharacterized protein	Biological Process:	GO:0005975 - carbohydrate metabolic process	Chitinase	3.2.1.14		NM 001176405.1	NP 001169876.1	LOC100383770	Zm.34868	C0PIX9	GBWI-49875	1525
					GO:0006032 - chitin catabolic process								KYUHN7
				Molecular Function:	GO:0004553 - hydrolase activity, hydrolyzing O-glycosyl compounds
					GO:0004568 - chitinase activity
33	GH-19	GRMZM2G005633	Endochitinase B Precursor; Fragment CHIT3-chitinase family protein precursor, expressed	Biological Process:	GO:0005975 - carbohydrate metabolic process	Chitinase	3.2.1.14	M84165	NM 001143277.1	NP 00136749.1	LOC100216890	Zm.87295	P29023	GBWI-50308	972	323
					GO:0006032 - chitin catabolic process							Zm.87300	C0P451
					GO:0008152 - metabolic process								B4FK87
					GO:0016998 - cell wall macromolecule catabolic process
					GO:0055114 - oxidation-reduction process
				Molecular Function:	GO:0004568 - chitinase activity
					GO:0008061 - chitin binding
					GO:0016491 - oxidoreductase activity
